# Supplementary material
Source: PubMed Central journal article supplement (PMC6879388)
Supplement: plantbiotechnology-35-2-18.0427a-s001.pdf [file plantbiotechnology-35-2-18.0427a-s001.pdf]

**Table S1. List of Primers used in this study**

| Experiment   | Sequence     |                                |               |                                     |
|--------------|--------------|--------------------------------|---------------|-------------------------------------|
|              | Primer name  | Forward                        | Primer name   | Reverse                             |
| Construction | BamHI-GRf    | ATGGGATCCCCTGAAGCTCGAAAAACAAAG | KpnI-GRr      | ATGGGTACCTCATTTCGATGAAACAGAAG       |
|              | SacII-WOX1f  | ATGCCGCGGATGTGGACGATGGGTTACAAC | WOX1BlcL1_1   | AGTGGATCCTGCTCCTGCGTTCCTCAATGGCAGAA |
|              | SacII-G3GFPf | ATGCCGCGGATGAGTAAAGGAGAAGAACTT | BamHI-G3GFPPr | AGTGGATCCTTTGTATAGTTCATCCATGCC      |
| RT-qPCR      | ACT2f        | TCCCTCAGCACATTCCAGCAGAT        | ACT2r         | AACGATTCCTGGACCTGCCTCATC            |
|              | CUC2f        | TGCCATCGCAGAAGTTGATC           | CUC2r         | TTCTCTCCCATCTTAGCTCTCCCG            |
|              | CUC3f        | TCTGGTAGCTCCCAAGGTTACAG        | CUC3r         | TGGTCTCTCCGGCATTACATTC              |
|              | MPf          | TACGCCACTTAGAACCAGGCCATC       | MPr           | CGGGAAACGAAGGTACATGGGAAC            |
|              | PIN1f        | ACAAAACGACGCAGGCTAAG           | PIN1r         | AGCTGGCATTTCATGTTCC                 |

**Table S2. List of log<sub>2</sub> expression level of DEX-up-IAA-up genes (>1.5-fold)**

| ProbeName    | GeneName  | AGI code  | EtOH_1 | EtOH_2 | DEX+EtOH_1 | DEX+EtOH_2 | EtOH+IAA_1 | EtOH+IAA_2 | DEX+IAA_1 | DEX+IAA_2 |
|--------------|-----------|-----------|--------|--------|------------|------------|------------|------------|-----------|-----------|
| A_84_P789756 | AA042562  |           | -4.89  | -4.32  | -3.27      | -3.32      | -3.41      | -3.22      | -2.93     | -2.66     |
| A_84_P13037  | AAP7      | AT5G23810 | 0.27   | -0.11  | 2.33       | 1.48       | 1.25       | 1.56       | 3.12      | 2.70      |
| A_84_P767740 | AAP7      | AT5G23810 | -3.66  | -3.67  | -0.85      | -2.15      | -2.41      | -2.23      | -0.53     | -0.86     |
| A_84_P20410  | ADS1      | AT1G06080 | 2.61   | 2.91   | 6.29       | 5.96       | 4.47       | 5.27       | 6.99      | 7.42      |
| A_84_P820492 | AFP3      | AT3G29575 | -0.34  | -0.19  | 1.14       | 1.21       | 2.66       | 2.60       | 2.07      | 1.92      |
| A_84_P203128 | AFP3      | AT3G29575 | -0.47  | -0.67  | 1.09       | 1.09       | 2.52       | 2.52       | 1.96      | 1.82      |
| A_84_P286390 | AOC3      | AT3G25780 | -0.83  | -0.67  | 0.39       | -0.01      | 0.60       | 0.33       | 1.34      | 0.96      |
| A_84_P17366  | AT1G01250 | AT1G01250 | -2.78  | -2.28  | -0.11      | 0.29       | -1.81      | -1.18      | -0.10     | 0.35      |
| A_84_P22852  | AT1G01520 | AT1G01520 | -2.65  | -3.32  | -1.17      | -2.31      | -1.31      | -1.88      | -1.31     | -2.10     |
| A_84_P838948 | AT1G01520 | AT1G01520 | -4.01  | -4.66  | -3.03      | -4.45      | -2.99      | -3.76      | -3.09     | -4.18     |
| A_84_P842621 | AT1G02670 | AT1G02670 | -2.31  | -1.90  | -1.70      | -1.09      | -1.86      | -1.48      | -1.19     | -0.74     |
| A_84_P606594 | AT1G02670 | AT1G02670 | -4.85  | -3.94  | -3.40      | -3.31      | -3.41      | -3.31      | -3.16     | -2.71     |
| A_84_P16098  | AT1G03730 | AT1G03730 | 2.81   | 2.94   | 3.30       | 2.77       | 3.62       | 3.04       | 3.32      | 2.91      |
| A_84_P851101 | AT1G03730 | AT1G03730 | -4.35  | -3.87  | -2.92      | -3.22      | -3.42      | -3.06      | -2.81     | -2.67     |
| A_84_P15190  | AT1G04330 | AT1G04330 | -3.60  | -3.07  | -2.26      | -1.74      | -1.76      | -1.85      | -1.07     | -0.79     |
| A_84_P522242 | AT1G07985 | AT1G07985 | -2.47  | -3.41  | -1.21      | -1.89      | -0.72      | -1.60      | -0.31     | -1.52     |
| A_84_P20899  | AT1G10640 | AT1G10640 | 2.62   | 2.94   | 4.16       | 4.42       | 3.47       | 4.01       | 4.05      | 4.24      |
| A_84_P555923 | AT1G11125 | AT1G11120 | 0.82   | 1.29   | 2.00       | 2.34       | 2.03       | 2.35       | 2.70      | 2.92      |
| A_84_P129976 | AT1G13360 | AT1G13360 | 2.89   | 2.82   | 3.56       | 3.50       | 3.53       | 3.54       | 4.01      | 3.96      |
| A_84_P860600 | AT1G13360 | AT1G13360 | -0.30  | -0.38  | 0.52       | 0.39       | 0.40       | 0.42       | 1.02      | 0.70      |
| A_84_P12487  | AT1G14390 | AT1G14390 | -0.94  | -0.69  | 0.07       | 0.46       | 0.62       | 0.71       | 1.12      | 1.23      |
| A_84_P20976  | AT1G19210 | AT1G19210 | -4.74  | -4.13  | -2.72      | -3.32      | -3.65      | -2.90      | -3.14     | -1.69     |
| A_84_P21770  | AT1G23060 | AT1G23060 | -1.48  | -1.55  | -0.44      | -0.52      | 0.94       | 0.84       | 1.60      | 1.34      |
| A_84_P266910 | AT1G47655 | AT1G47655 | -0.81  | -0.49  | 0.26       | 0.77       | 1.30       | 1.49       | 1.96      | 2.14      |
| A_84_P15213  | AT1G47670 | AT1G47670 | 3.28   | 3.62   | 3.96       | 4.43       | 4.03       | 4.34       | 4.72      | 5.01      |
| A_84_P19573  | AT1G48100 | AT1G48100 | 2.16   | 1.96   | 3.09       | 3.01       | 2.83       | 2.71       | 2.81      | 2.53      |
| A_84_P23351  | AT1G48180 | AT1G48180 | -4.83  | -4.62  | -3.44      | -3.11      | -3.33      | -3.64      | -4.13     | -3.08     |
| A_84_P168923 | AT1G48330 | AT1G48330 | 0.66   | 1.14   | 1.38       | 2.32       | 1.39       | 2.13       | 2.19      | 2.91      |
| A_84_P23648  | AT1G51170 | AT1G51170 | 1.08   | 1.43   | 1.68       | 2.19       | 2.34       | 2.57       | 2.43      | 2.50      |
| A_84_P15194  | AT1G54020 | AT1G54020 | -3.15  | -3.16  | 1.07       | 2.08       | -1.29      | -1.24      | 1.67      | 1.56      |
| A_84_P503731 | AT1G54575 | AT1G54575 | -0.26  | -1.55  | 0.61       | 0.17       | 0.43       | -0.43      | 0.60      | -0.11     |
| A_84_P818130 | AT1G62610 | AT1G62610 | -0.05  | 0.01   | 0.40       | 0.75       | 0.29       | 0.48       | 0.54      | 0.80      |
| A_84_P596994 | AT1G62610 | AT1G62610 | -3.72  | -3.70  | -3.05      | -2.61      | -3.11      | -3.03      | -3.02     | -2.66     |
| A_84_P14874  | AT1G62770 | AT1G62770 | -1.33  | -1.18  | -0.44      | -0.03      | 0.83       | 1.61       | 1.36      | 2.19      |
| A_84_P12439  | AT1G68110 | AT1G68110 | -3.89  | -3.60  | -2.43      | -2.84      | -3.06      | -3.00      | -3.10     | -2.59     |
| A_84_P19840  | AT1G71691 | AT1G71691 | -1.50  | -0.78  | -0.71      | 0.04       | -0.14      | -0.14      | -0.47     | 0.23      |
| A_84_P750168 | AT1G75060 | AT1G75060 | 0.74   | 0.99   | 1.12       | 1.65       | 1.29       | 1.72       | 1.61      | 1.94      |
| A_84_P524195 | AT1G75060 | AT1G75060 | -0.22  | 0.05   | 0.44       | 0.92       | 0.40       | 0.79       | 0.81      | 1.15      |
| A_84_P18113  | AT1G76640 | AT1G76640 | -3.73  | -3.74  | -1.24      | -0.82      | -1.17      | -0.91      | -0.29     | 0.04      |
| A_84_P73664  | AT1G77855 | AT1G77855 | -1.02  | -0.78  | 1.01       | 1.10       | 0.10       | 0.23       | 1.69      | 1.59      |
| A_84_P281740 | AT1G78070 | AT1G78070 | 1.95   | 1.92   | 2.73       | 2.46       | 2.92       | 2.60       | 3.11      | 2.57      |
| A_84_P785283 | AT1G78070 | AT1G78070 | 0.76   | 0.57   | 1.57       | 1.34       | 1.62       | 1.39       | 1.97      | 1.35      |
| A_84_P147538 | AT1G80865 | AT1G80865 | -4.49  | -4.13  | -2.44      | -1.60      | -3.70      | -3.13      | -2.26     | -1.86     |
| A_84_P246685 | AT2G07360 | AT2G07360 | 5.04   | 5.06   | 5.05       | 5.21       | 5.02       | 5.12       | 5.08      | 5.22      |
| A_84_P819612 | AT2G07360 | AT2G07360 | 3.97   | 3.98   | 4.04       | 4.25       | 4.00       | 4.07       | 4.05      | 4.25      |
| A_84_P803354 | AT2G07360 | AT2G07360 | -4.12  | -4.27  | -3.51      | -2.97      | -3.38      | -3.59      | -3.10     | -3.30     |
| A_84_P755231 | AT2G14270 | AT2G14270 | 0.73   | 1.07   | 1.60       | 1.76       | 1.35       | 1.70       | 1.95      | 2.35      |
| A_84_P758125 | AT2G16668 | AT2G16668 | -4.68  | -4.71  | -3.68      | -3.75      | -3.81      | -3.97      | -3.76     | -3.66     |
| A_84_P98146  | AT2G17500 | AT2G17500 | 2.14   | 1.20   | 3.00       | 1.97       | 3.49       | 2.95       | 3.66      | 2.94      |
| A_84_P816631 | AT2G17500 | AT2G17500 | -0.54  | -1.45  | 0.72       | -0.61      | 0.86       | 0.22       | 1.12      | 0.47      |
| A_84_P555310 | AT2G36650 | AT2G36650 | -2.87  | -2.71  | -1.86      | -2.02      | -1.95      | -2.11      | -2.00     | -2.22     |
| A_84_P13527  | AT2G37030 | AT2G37030 | -1.60  | -2.43  | -0.20      | -0.89      | 0.57       | 0.96       | 3.22      | 2.85      |
| A_84_P15421  | AT2G37760 | AT2G37760 | 1.16   | -0.22  | 1.76       | 1.05       | 2.05       | 0.86       | 1.91      | 1.15      |
| A_84_P820187 | AT2G37760 | AT2G37760 | -1.15  | -2.49  | -0.38      | -1.10      | -0.36      | -1.37      | -0.19     | -0.96     |
| A_84_P586474 | AT2G39855 | AT2G39855 | -3.60  | -3.40  | -1.19      | -1.30      | -1.56      | -1.12      | 0.54      | 0.56      |
| A_84_P23844  | AT2G43870 | AT2G43870 | -2.11  | -1.95  | -0.60      | -0.34      | 0.01       | 0.08       | 1.40      | 1.79      |
| A_84_P506584 | AT2G46375 | AT2G46375 | -3.70  | -3.81  | -2.66      | -2.75      | -2.95      | -3.13      | -2.47     | -3.72     |
| A_84_P216308 | AT2G47270 | AT2G47270 | -4.79  | -4.02  | -1.84      | -2.42      | -1.18      | -1.19      | -0.36     | -0.11     |
| A_84_P125091 | AT3G04860 | AT3G04860 | 0.96   | 1.10   | 1.73       | 2.25       | 1.69       | 1.85       | 2.20      | 2.23      |
| A_84_P242043 | AT3G19500 | AT3G19500 | -4.87  | -3.70  | -3.59      | -2.74      | -3.88      | -3.09      | -3.76     | -2.90     |
| A_84_P559854 | AT3G20830 | AT3G20830 | -0.50  | -0.65  | -0.07      | 0.29       | 0.37       | 0.33       | 0.79      | 0.54      |
| A_84_P841540 | AT3G20830 | AT3G20830 | -0.69  | -0.63  | -0.03      | 0.17       | 0.35       | 0.36       | 0.78      | 0.55      |
| A_84_P23101  | AT3G21890 | AT3G21890 | -1.01  | -2.03  | 0.10       | -0.95      | 0.03       | -0.55      | 0.11      | -0.96     |
| A_84_P507571 | AT3G25130 | AT3G25130 | -0.95  | -0.49  | -0.06      | 0.37       | -0.15      | 0.14       | 0.56      | 0.81      |
| A_84_P117052 | AT3G25640 | AT3G25640 | 0.17   | 0.67   | 1.02       | 1.62       | 1.07       | 1.49       | 1.72      | 2.35      |
| A_84_P762469 | AT3G26742 | AT3G26742 | -3.90  | -3.47  | -2.48      | -2.61      | -2.77      | -2.31      | -1.85     | -1.66     |
| A_84_P787999 | AT3G29370 | AT3G29370 | -0.35  | -0.47  | 1.00       | 0.77       | 3.69       | 3.65       | 4.13      | 4.17      |
| A_84_P144819 | AT3G29370 | AT3G29370 | -1.74  | -1.81  | -0.23      | -0.44      | 2.49       | 2.42       | 2.90      | 2.92      |
| A_84_P286640 | AT3G48510 | AT3G48510 | -2.60  | -2.97  | -1.98      | -1.84      | -1.51      | -1.42      | -1.59     | -1.92     |
| A_84_P20327  | AT3G50400 | AT3G50400 | -4.10  | -3.68  | -2.90      | -2.71      | -3.29      | -2.58      | -2.28     | -1.95     |
| A_84_P592005 | AT3G57380 | AT3G57380 | -3.52  | -3.94  | -1.68      | -2.20      | -2.32      | -3.11      | -1.78     | -2.60     |
| A_84_P869477 | AT3G60520 | AT3G60520 | 1.33   | 1.10   | 2.87       | 2.60       | 2.99       | 3.14       | 3.96      | 3.96      |

|              |            |           |       |       |       |       |       |       |       |       |
|--------------|------------|-----------|-------|-------|-------|-------|-------|-------|-------|-------|
| A_84_P304930 | AT3G60520  | AT3G60520 | 0.79  | 0.60  | 2.56  | 2.27  | 2.60  | 2.64  | 3.45  | 3.47  |
| A_84_P17537  | AT3G61680  | AT3G61680 | -2.82 | -2.65 | -0.68 | -0.84 | -0.50 | -0.01 | 0.98  | 1.10  |
| A_84_P764577 | AT4G14819  | AT4G14819 | -1.96 | -1.87 | -0.97 | -0.61 | 2.04  | 1.96  | 2.26  | 2.14  |
| A_84_P502380 | AT4G19970  | AT4G19970 | -4.06 | -3.77 | -2.27 | -1.91 | -3.42 | -2.82 | -2.04 | -1.79 |
| A_84_P765231 | AT4G20320  | AT4G20320 | 0.85  | 1.47  | 2.16  | 2.40  | 1.58  | 2.02  | 2.46  | 2.97  |
| A_84_P831942 | AT4G20320  | AT4G20320 | -2.44 | -2.02 | -0.90 | -0.67 | -1.80 | -1.24 | -0.86 | -0.22 |
| A_84_P833441 | AT4G20320  | AT4G20320 | -4.10 | -3.80 | -2.61 | -2.37 | -3.38 | -2.67 | -2.30 | -1.92 |
| A_84_P231229 | AT4G21930  | AT4G21930 | -2.33 | -3.10 | -0.74 | -1.17 | -1.59 | -1.85 | -1.97 | -2.07 |
| A_84_P522811 | AT4G23720  | AT4G23720 | -1.59 | -1.08 | -0.56 | -0.31 | -0.20 | 0.09  | 0.67  | 0.80  |
| A_84_P18585  | AT4G28650  | AT4G28650 | -1.76 | -1.46 | -0.49 | -0.11 | 0.09  | 0.26  | 0.09  | 0.45  |
| A_84_P825877 | AT4G28650  | AT4G28650 | -4.42 | -3.98 | -2.61 | -2.31 | -2.08 | -2.09 | -2.20 | -1.98 |
| A_84_P593014 | AT4G31110  | AT4G31110 | -2.65 | -2.17 | -2.11 | -2.03 | -2.16 | -1.81 | -2.09 | -2.03 |
| A_84_P789549 | AT4G31110  | AT4G31110 | -4.47 | -4.18 | -3.86 | -3.28 | -3.54 | -3.26 | -3.14 | -3.11 |
| A_84_P15762  | AT4G31910  | AT4G31910 | 0.46  | 0.80  | 1.26  | 1.96  | 1.92  | 2.45  | 2.68  | 2.99  |
| A_84_P583210 | AT4G33550  | AT4G33550 | -2.42 | -2.14 | -0.68 | 0.05  | -1.04 | -0.46 | -1.02 | -0.37 |
| A_84_P549446 | AT4G35720  | AT4G35720 | 0.15  | 0.38  | 1.41  | 1.24  | 2.20  | 2.71  | 2.67  | 3.07  |
| A_84_P233347 | AT4G36010  | AT4G36010 | 1.76  | 2.09  | 2.47  | 3.15  | 2.56  | 2.88  | 2.71  | 2.86  |
| A_84_P117782 | AT4G37690  | AT4G37690 | -4.22 | -3.98 | -3.38 | -3.00 | -3.50 | -3.35 | -3.61 | -2.80 |
| A_84_P740964 | AT5G08760  | AT5G08760 | 1.14  | 0.57  | 1.95  | 1.45  | 1.74  | 1.80  | 2.69  | 2.11  |
| A_84_P843324 | AT5G08760  | AT5G08760 | -0.73 | -1.07 | 0.06  | -0.34 | 0.04  | -0.09 | 0.77  | 0.16  |
| A_84_P570789 | AT5G11360  | AT5G11360 | -4.77 | -4.27 | -3.13 | -3.15 | -3.65 | -3.20 | -2.78 | -2.71 |
| A_84_P542432 | AT5G20810  | AT5G20810 | -3.79 | -4.20 | -3.03 | -2.77 | -3.17 | -2.79 | -3.22 | -2.50 |
| A_84_P592224 | AT5G23100  | AT5G23100 | -0.18 | 0.02  | 0.95  | 1.54  | 0.58  | 0.62  | 1.29  | 1.78  |
| A_84_P199084 | AT5G38200  | AT5G38200 | 1.90  | 1.92  | 3.54  | 3.21  | 3.38  | 3.51  | 4.01  | 4.26  |
| A_84_P10228  | AT5G38820  | AT5G38820 | -3.96 | -3.44 | -3.17 | -2.48 | -2.91 | -2.37 | -2.83 | -2.08 |
| A_84_P574406 | AT5G39240  | AT5G39240 | 0.22  | 1.32  | 2.13  | 3.21  | 2.70  | 3.03  | 3.47  | 3.77  |
| A_84_P595814 | AT5G40800  | AT5G40800 | -3.75 | -4.14 | -2.42 | -3.00 | -1.72 | -1.77 | -2.76 | -2.82 |
| A_84_P544283 | AT5G48175  | AT5G48175 | -2.47 | -2.66 | -0.58 | -1.68 | -1.43 | -1.08 | -0.09 | -0.75 |
| A_84_P586962 | AT5G56880  | AT5G56880 | -2.96 | -2.50 | -1.22 | -0.74 | -1.83 | -0.91 | -0.79 | -0.20 |
| A_84_P840907 | AT5G56880  | AT5G56880 | -4.57 | -3.62 | -2.90 | -2.57 | -3.52 | -2.60 | -2.47 | -1.99 |
| A_84_P825325 | AT5G57340  | AT5G57340 | 0.28  | 0.39  | 0.88  | 1.13  | 1.10  | 1.25  | 1.05  | 1.34  |
| A_84_P767982 | AT5G57340  | AT5G57340 | -2.44 | -2.32 | -1.30 | -1.19 | -1.61 | -1.16 | -1.23 | -0.79 |
| A_84_P559359 | AT5G57785  | AT5G57785 | 0.43  | 0.77  | 1.46  | 1.74  | 1.92  | 2.28  | 2.04  | 2.49  |
| A_84_P553153 | AT5G57790  | AT5G57790 | -1.54 | -1.17 | -0.27 | 0.11  | 0.00  | 0.42  | 0.56  | 0.88  |
| A_84_P134445 | AT5G60760  | AT5G60760 | -2.29 | -2.01 | -1.02 | -0.64 | -1.11 | -1.30 | -0.37 | -0.07 |
| A_84_P13151  | AT5G61820  | AT5G61820 | 3.51  | 2.62  | 4.19  | 2.93  | 4.20  | 3.20  | 4.03  | 2.58  |
| A_84_P856918 | AT5G61820  | AT5G61820 | -1.12 | -2.13 | 0.01  | -1.52 | -0.29 | -1.36 | -0.25 | -1.84 |
| A_84_P793448 | AT5G61820  | AT5G61820 | -2.87 | -3.46 | -2.25 | -3.02 | -2.30 | -3.14 | -2.12 | -3.53 |
| A_84_P23571  | AT5G66080  | AT5G66080 | -1.13 | -0.82 | 0.78  | 0.91  | 1.01  | 1.45  | 2.36  | 2.48  |
| A_84_P597692 | AT5G66450  | AT5G66450 | 2.75  | 2.84  | 2.54  | 2.98  | 2.66  | 2.91  | 2.64  | 2.90  |
| A_84_P850105 | AT5G66450  | AT5G66455 | -2.56 | -2.22 | -1.69 | -1.32 | -1.97 | -1.49 | -1.73 | -1.13 |
| A_84_P792311 | AT5G66450  | AT5G66450 | -1.46 | -1.25 | -0.85 | -0.37 | -1.21 | -0.70 | -0.48 | -0.06 |
| A_84_P21681  | AT5G66460  | AT5G66460 | -0.16 | -0.17 | 0.68  | 0.77  | 1.53  | 1.53  | 1.27  | 1.30  |
| A_84_P223759 | AT5G66580  | AT5G66580 | 0.59  | 0.86  | 1.30  | 2.39  | 3.37  | 3.49  | 3.78  | 3.63  |
| A_84_P21683  | AT5G66940  | AT5G66940 | 1.11  | 1.86  | 3.00  | 3.91  | 3.70  | 3.72  | 4.53  | 4.63  |
| A_84_P21341  | ATPMPEPCRB | AT4G02330 | 2.68  | 2.65  | 3.68  | 3.51  | 3.48  | 3.23  | 4.09  | 3.56  |
| A_84_P751391 | AY087114   | AT1G21525 | -3.85 | -3.64 | 1.01  | -0.53 | -2.43 | -1.72 | 1.89  | 1.15  |
| A_84_P582920 | BAP2       | AT2G45760 | -4.64 | -4.82 | -2.05 | -2.64 | -3.81 | -4.14 | -2.67 | -3.80 |
| A_84_P14435  | BAS1       | AT2G26710 | -1.45 | -0.95 | -0.03 | 0.99  | 0.80  | 0.98  | 2.03  | 2.02  |
| A_84_P23646  | BCA3       | AT1G23730 | -0.56 | -0.94 | 0.58  | 0.30  | 1.01  | 0.88  | 1.79  | 1.52  |
| A_84_P850621 | BIM1       | AT5G08130 | 3.57  | 3.60  | 3.87  | 4.23  | 4.12  | 4.31  | 4.21  | 4.50  |
| A_84_P19621  | BIM1       | AT5G08130 | 2.73  | 2.67  | 2.85  | 3.34  | 3.19  | 3.50  | 3.42  | 3.72  |
| A_84_P810630 | BIM1       | AT5G08130 | -3.05 | -2.43 | -2.25 | -1.78 | -1.83 | -1.51 | -1.88 | -1.69 |
| A_84_P795619 | BIM1       | AT5G08130 | -0.32 | -0.41 | -0.32 | 0.12  | 0.09  | 0.30  | 0.23  | 0.31  |
| A_84_P851509 | BP670694   |           | -3.18 | -3.47 | -2.13 | -2.34 | -2.53 | -2.60 | -2.73 | -2.45 |
| A_84_P819429 | BPEp       | AT1G59640 | -1.53 | -0.83 | -0.17 | 0.10  | -0.82 | -0.68 | -0.25 | 0.00  |
| A_84_P562234 | BPEp       | AT1G59640 | -2.12 | -1.71 | -0.65 | -0.57 | -1.27 | -1.11 | -0.92 | -0.64 |
| A_84_P16727  | BRU6       | AT4G37390 | -0.32 | 0.22  | 0.88  | 1.97  | 5.18  | 4.82  | 5.99  | 5.54  |
| A_84_P769292 | BX833772   | AT5G03552 | -0.92 | -0.85 | 0.11  | 0.14  | -0.30 | -0.05 | 0.23  | 0.35  |
| A_84_P10585  | CDS1       | AT1G62430 | 1.84  | 2.27  | 2.45  | 3.01  | 2.41  | 2.80  | 2.79  | 3.06  |
| A_84_P821514 | CDS1       | AT1G62430 | -1.82 | -1.36 | -0.85 | -0.49 | -1.08 | -0.71 | -0.78 | -0.57 |
| A_84_P20987  | chr31      | AT1G05490 | -3.81 | -3.14 | -2.38 | -1.72 | -2.74 | -2.09 | -2.12 | -1.39 |
| A_84_P837470 | chr31      | AT1G05490 | -3.99 | -2.96 | -2.64 | -1.94 | -2.77 | -2.36 | -2.06 | -1.59 |
| A_84_P126931 | CLE16      | AT2G01505 | -0.37 | 0.16  | 0.39  | 0.93  | -0.37 | 0.26  | 0.30  | 0.80  |
| A_84_P789435 | CLE16      | AT2G01505 | -3.69 | -3.59 | -2.50 | -2.28 | -2.98 | -2.75 | -2.61 | -2.41 |
| A_84_P14345  | CPK29      | AT1G76040 | 1.57  | 1.36  | 3.33  | 2.35  | 2.01  | 1.79  | 3.72  | 2.73  |
| A_84_P805748 | CPK29      | AT1G76040 | -2.12 | -2.25 | -0.30 | -1.40 | -1.49 | -1.59 | 0.18  | -0.89 |
| A_84_P18479  | CYCP3;2    | AT3G60550 | -2.82 | -3.23 | -1.63 | -2.07 | -1.65 | -2.11 | -1.37 | -1.69 |
| A_84_P286120 | CYP707A1   | AT4G19230 | -3.50 | -3.28 | -2.12 | -2.49 | -1.93 | -2.04 | -1.58 | -2.10 |
| A_84_P784432 | CYP707A1   | AT4G19230 | -4.80 | -3.82 | -3.27 | -3.68 | -2.72 | -2.72 | -2.41 | -3.11 |
| A_84_P16316  | CYP96A1    | AT2G23180 | 1.97  | 1.91  | 2.68  | 2.61  | 3.28  | 3.41  | 3.82  | 3.79  |
| A_84_P753234 | DR356110   | AT1G12672 | -4.74 | -4.99 | -3.13 | -3.74 | -3.10 | -3.53 | -2.12 | -2.76 |
| A_84_P530411 | DTA4       | AT1G79760 | -3.70 | -3.66 | -2.91 | -2.35 | -1.95 | -1.86 | -1.03 | -1.43 |
| A_84_P137739 | EDL3       | AT3G63060 | -1.84 | -2.36 | -1.21 | -1.36 | -1.17 | -1.47 | -1.10 | -1.20 |

|              |              |           |       |       |       |       |       |       |       |       |
|--------------|--------------|-----------|-------|-------|-------|-------|-------|-------|-------|-------|
| A_84_P786422 | EDL3         | AT3G63060 | -2.12 | -2.46 | -1.63 | -1.80 | -1.64 | -1.73 | -1.31 | -1.58 |
| A_84_P750050 | EF182835     | AT1G12670 | -4.04 | -4.91 | -1.23 | -1.70 | -1.39 | -1.53 | 0.10  | -0.43 |
| A_84_P23436  | FAR1         | AT5G22500 | 2.78  | 2.80  | 3.55  | 3.75  | 4.18  | 4.58  | 4.45  | 4.50  |
| A_84_P815985 | FAR1         | AT5G22500 | 0.19  | 0.01  | 0.98  | 1.14  | 1.53  | 1.88  | 1.71  | 1.84  |
| A_84_P21248  | FAR8         | AT3G44560 | -4.67 | -3.73 | -3.29 | -3.07 | -2.52 | -2.27 | -2.21 | -2.43 |
| A_84_P19451  | GA1          | AT4G02780 | -2.61 | -2.21 | -1.41 | -1.04 | -0.72 | -0.34 | 0.95  | 0.68  |
| A_84_P10329  | GCL1         | AT5G65280 | 1.76  | 1.78  | 2.85  | 3.48  | 2.66  | 2.89  | 3.87  | 3.76  |
| A_84_P96816  | GDU2         | AT4G25760 | -0.08 | 0.13  | 0.77  | 1.32  | 1.02  | 0.87  | 1.53  | 1.44  |
| A_84_P15343  | GH3.1        | AT2G14960 | -3.74 | -3.18 | -2.59 | -2.02 | 1.53  | 1.26  | 2.34  | 1.74  |
| A_84_P20957  | GH9C2        | AT1G64390 | 2.70  | 3.10  | 3.47  | 4.16  | 3.36  | 3.91  | 3.87  | 4.28  |
| A_84_P811148 | GH9C2        | AT1G64390 | 2.15  | 2.63  | 2.92  | 3.59  | 2.85  | 3.33  | 3.25  | 3.69  |
| A_84_P849563 | GH9C2        | AT1G64390 | 0.88  | 1.37  | 1.79  | 2.43  | 1.63  | 2.12  | 2.11  | 2.54  |
| A_84_P811171 | GH9C2        | AT1G64390 | -0.56 | -0.40 | -0.26 | 0.07  | -0.28 | -0.29 | -0.06 | -0.04 |
| A_84_P802645 | GH9C2        | AT1G64390 | -1.28 | -0.61 | -0.27 | 0.35  | -0.52 | 0.09  | 0.04  | 0.38  |
| A_84_P811159 | GH9C2        | AT1G64390 | -2.20 | -1.78 | -1.40 | -1.07 | -1.73 | -1.56 | -1.21 | -1.20 |
| A_84_P811165 | GH9C2        | AT1G64390 | -1.39 | -0.87 | -0.29 | 0.27  | -0.70 | -0.03 | -0.12 | 0.29  |
| A_84_P811154 | GH9C2        | AT1G64390 | -2.05 | -1.49 | -0.80 | -0.28 | -1.22 | -0.62 | -0.67 | -0.21 |
| A_84_P16114  | GoS3         | AT1G09350 | -4.98 | -4.35 | -3.05 | -3.34 | -4.16 | -3.58 | -2.05 | -2.15 |
| A_84_P23915  | GRP2B        | AT2G21060 | 3.49  | 3.87  | 4.28  | 4.73  | 4.26  | 4.60  | 4.90  | 5.33  |
| A_84_P11248  | HAI1         | AT5G59220 | -1.27 | -1.11 | 0.51  | 0.65  | 0.90  | 0.65  | 0.85  | 0.59  |
| A_84_P526863 | IAA32        | AT2G01200 | -2.30 | -1.63 | -0.98 | 0.14  | 1.41  | 2.13  | 2.65  | 2.66  |
| A_84_P24106  | iqd15        | AT3G49380 | -3.49 | -2.64 | -2.56 | -2.05 | -2.43 | -1.93 | -1.80 | -1.12 |
| A_84_P823166 | LAX2         | AT2G21050 | 4.52  | 4.85  | 5.16  | 5.83  | 6.72  | 6.83  | 7.34  | 7.31  |
| A_84_P11622  | LAX2         | AT2G21050 | 3.27  | 3.66  | 3.94  | 4.71  | 5.56  | 5.68  | 6.24  | 6.24  |
| A_84_P55930  | LFY          | AT5G61850 | -4.68 | -3.84 | -3.75 | -2.50 | -3.20 | -2.95 | -2.89 | -2.46 |
| A_84_P231259 | LRP1         | AT5G12330 | 0.71  | 0.81  | 1.43  | 1.88  | 2.12  | 2.22  | 2.17  | 2.39  |
| A_84_P12315  | MGL          | AT1G64660 | 1.99  | 1.48  | 3.00  | 2.84  | 3.65  | 3.58  | 3.82  | 3.50  |
| A_84_P813210 | MGL          | AT1G64660 | -3.78 | -3.92 | -2.98 | -2.97 | -2.46 | -2.10 | -2.27 | -2.42 |
| A_84_P21913  | MP           | AT1G19850 | 4.15  | 4.38  | 5.57  | 6.11  | 5.24  | 5.61  | 6.25  | 6.59  |
| A_84_P18699  | MYB56        | AT5G17800 | -2.44 | -2.03 | -1.47 | -0.68 | -1.34 | -0.62 | -0.86 | -0.40 |
| A_84_P17140  | MYC2         | AT1G32640 | 2.99  | 3.11  | 4.28  | 4.31  | 3.82  | 3.99  | 4.20  | 4.05  |
| A_84_P796568 | MYC2         | AT1G32640 | -0.63 | -0.76 | -0.10 | -0.71 | 0.07  | 0.20  | 0.72  | 0.40  |
| A_84_P264370 | NAC084       | AT5G14000 | 0.65  | 0.65  | 1.39  | 1.25  | 1.40  | 1.50  | 1.88  | 1.67  |
| A_84_P16775  | NF-YA10      | AT5G06510 | -3.01 | -2.96 | -2.00 | -1.66 | -1.84 | -2.03 | -1.93 | -1.96 |
| A_84_P21605  | NIG1         | AT5G46830 | -2.66 | -2.58 | -0.43 | 0.20  | -1.12 | -0.91 | -0.92 | -1.43 |
| A_84_P19887  | NIP6;1       | AT1G80760 | 2.19  | 2.38  | 3.51  | 3.55  | 2.84  | 3.10  | 3.28  | 3.47  |
| A_84_P843330 | NP335312     |           | -2.49 | -2.30 | -1.37 | -1.64 | -1.10 | -1.19 | -0.18 | -0.82 |
| A_84_P21121  | NP454692     |           | -1.81 | -1.08 | -0.47 | 0.56  | 1.91  | 2.53  | 3.02  | 3.02  |
| A_84_P15935  | NSP5         | AT5G48180 | 6.70  | 6.26  | 7.05  | 6.75  | 7.72  | 7.87  | 7.81  | 7.75  |
| A_84_P796347 | NSP5         | AT5G48180 | 2.31  | 1.85  | 2.96  | 2.53  | 3.46  | 3.60  | 3.65  | 3.55  |
| A_84_P21273  | OBP1         | AT3G50410 | 0.65  | 0.87  | 1.10  | 1.82  | 1.76  | 1.87  | 2.02  | 2.18  |
| A_84_P855408 | OBP1         | AT3G50410 | -0.07 | 0.19  | 0.54  | 1.04  | 0.97  | 1.17  | 1.40  | 1.39  |
| A_84_P11587  | P5CS1        | AT2G39800 | 0.58  | 0.78  | 1.56  | 1.76  | 1.43  | 1.80  | 1.57  | 1.46  |
| A_84_P724318 | PGIP1        | AT5G06865 | -0.49 | -1.15 | 0.21  | -0.16 | 0.08  | -0.48 | 0.70  | 0.19  |
| A_84_P22452  | PGIP1        | AT5G06860 | 4.25  | 2.86  | 5.16  | 3.48  | 5.57  | 4.45  | 5.73  | 4.61  |
| A_84_P23398  | PGIP2        | AT5G06870 | 2.91  | 2.63  | 3.87  | 3.87  | 3.71  | 3.71  | 4.57  | 4.30  |
| A_84_P787935 | PIL1         | AT2G46970 | -2.79 | -2.91 | -0.91 | -1.01 | -1.41 | -1.43 | -1.21 | -1.74 |
| A_84_P521683 | PIL1         | AT2G46970 | -3.12 | -3.32 | -1.35 | -1.40 | -1.80 | -1.75 | -1.61 | -1.98 |
| A_84_P111175 | PIN1         | AT1G73590 | 2.70  | 3.18  | 3.80  | 4.61  | 4.27  | 4.54  | 4.94  | 5.25  |
| A_84_P13809  | PRR2         | AT4G13660 | -2.60 | -2.55 | -1.08 | -0.87 | -1.21 | -1.12 | -0.74 | -0.47 |
| A_84_P178324 | PUB29        | AT3G18710 | 2.15  | 2.23  | 3.21  | 3.19  | 3.14  | 3.26  | 3.96  | 3.92  |
| A_84_P811911 | RAB18        | AT5G66400 | 1.92  | 4.48  | 2.18  | 4.56  | 2.32  | 4.27  | 2.65  | 4.43  |
| A_84_P861274 | RAB18        | AT5G66400 | -1.62 | -1.62 | -0.03 | -0.43 | 0.09  | 0.46  | 0.09  | -0.37 |
| A_84_P18843  | RAB18        | AT5G66400 | -2.77 | -2.43 | -0.94 | -1.35 | -0.89 | -0.63 | -1.08 | -1.38 |
| A_84_P13601  | RABC2b       | AT3G09910 | -1.64 | -1.44 | 0.21  | 0.18  | -0.87 | -0.42 | -0.08 | 0.02  |
| A_84_P594466 | RALFL18      | AT2G33130 | -3.70 | -4.63 | 0.10  | -1.85 | 1.23  | 0.40  | 2.99  | 2.47  |
| A_84_P10392  | RIC7         | AT4G28560 | -1.42 | -0.89 | -0.18 | 0.45  | -0.73 | -0.30 | -0.36 | 0.17  |
| A_84_P248025 | RLP29        | AT2G42800 | 0.61  | 1.14  | 1.31  | 2.05  | 2.29  | 2.68  | 2.81  | 3.13  |
| A_84_P15524  | RLP38        | AT3G23120 | -3.58 | -3.57 | -0.19 | -1.18 | -2.67 | -2.96 | -0.04 | -1.57 |
| A_84_P14084  | ROPGEF2      | AT1G01700 | -2.10 | -1.71 | -1.27 | -0.97 | -1.44 | -1.07 | -0.67 | -0.28 |
| A_84_P753024 | RTFL21       | AT1G67265 | -2.94 | -2.78 | -1.15 | -1.24 | -1.75 | -1.27 | 0.09  | 0.08  |
| A_84_P13455  | SIP4         | AT2G30360 | 0.73  | 0.78  | 1.53  | 1.44  | 1.86  | 1.75  | 1.95  | 1.92  |
| A_84_P800880 | ST2A         | AT5G07010 | -2.77 | -3.13 | -2.13 | -2.60 | -1.31 | -0.60 | -1.19 | -1.07 |
| A_84_P16777  | ST2A         | AT5G07010 | -3.53 | -3.95 | -2.65 | -3.20 | -1.96 | -1.14 | -1.63 | -1.48 |
| A_84_P127161 | SULTR3;1     | AT3G51895 | 0.68  | -0.01 | 1.55  | 0.48  | 1.95  | 1.61  | 2.22  | 0.97  |
| A_84_P825382 | SULTR3;1     | AT3G51895 | 0.51  | -0.26 | 1.53  | 0.41  | 1.82  | 1.35  | 2.12  | 0.79  |
| A_84_P822209 | SUS3         | AT4G02280 | -1.75 | -2.07 | -0.91 | -1.09 | -0.25 | -0.44 | -0.60 | -0.85 |
| A_84_P16611  | SUS3         | AT4G02280 | -1.94 | -2.54 | -1.34 | -1.44 | -0.72 | -0.90 | -0.91 | -1.19 |
| A_84_P20094  | SYPI25       | AT1G11250 | -4.62 | -4.83 | -3.31 | -3.75 | -3.52 | -2.54 | -1.92 | -1.70 |
| A_84_P821436 | TA36695_3702 |           | -4.06 | -3.98 | -3.47 | -2.66 | -3.37 | -3.26 | -3.27 | -2.98 |
| A_84_P825910 | TA41735_3702 |           | 0.53  | 0.69  | 2.19  | 2.23  | 1.29  | 1.62  | 1.85  | 2.09  |
| A_84_P833862 | TA50968_3702 |           | 4.43  | 4.30  | 5.55  | 5.86  | 5.03  | 5.21  | 6.07  | 6.08  |
| A_84_P836806 | TA52627_3702 |           | -4.06 | -3.84 | -2.76 | -3.10 | -2.52 | -2.23 | -2.15 | -1.80 |
| A_84_P768839 | TC405490     | AT5G66455 | -0.40 | -0.01 | 0.47  | 0.99  | 0.25  | 0.72  | 0.80  | 1.33  |

|              |      |           |       |       |       |       |       |       |       |       |
|--------------|------|-----------|-------|-------|-------|-------|-------|-------|-------|-------|
| A_84_P17073  | WAT1 | AT1G75500 | 4.06  | 4.35  | 4.50  | 5.22  | 5.39  | 5.81  | 5.86  | 6.16  |
| A_84_P853789 | WAT1 | AT1G75500 | 0.61  | 1.06  | 1.30  | 1.98  | 2.02  | 2.50  | 2.62  | 2.91  |
| A_84_P700154 | WAT1 | AT1G75500 | -2.77 | -2.31 | -2.18 | -1.75 | -1.60 | -1.46 | -1.33 | -1.20 |
| A_84_P17047  | ZFP1 | AT1G80730 | -3.88 | -2.62 | -2.07 | -0.90 | -1.52 | -1.07 | -1.11 | -0.54 |

---

**Table S3. List of log<sub>2</sub> expression level of DEX-up-IAA-down genes (>1.5-fold)**

| ProbeName    | GeneName  | AGI code  | EtOH_1 | EtOH_2 | DEX+EtOH_1 | DEX+EtOH_2 | EtOH+IAA_1 | EtOH+IAA_2 | DEX+IAA_1 | DEX+IAA_2 |
|--------------|-----------|-----------|--------|--------|------------|------------|------------|------------|-----------|-----------|
| A_84_P12679  | 4CL2      | AT3G21240 | -0.99  | -0.88  | -0.12      | 0.11       | -1.94      | -1.72      | -1.13     | -1.17     |
| A_84_P786411 | AF418241  | AT4G03060 | 0.49   | 0.97   | 2.35       | 2.63       | -0.45      | -0.38      | 1.13      | 1.11      |
| A_84_P13778  | AF418241  | AT4G03060 | -0.10  | 0.53   | 1.97       | 2.24       | -0.78      | -0.83      | 0.66      | 0.66      |
| A_84_P23725  | AHA10     | AT1G17260 | -2.96  | -3.27  | -2.33      | -2.33      | -3.67      | -4.03      | -2.78     | -2.42     |
| A_84_P159845 | AT14A     | AT3G28290 | 1.22   | 2.13   | 4.08       | 4.82       | -0.11      | 0.71       | 3.16      | 3.62      |
| A_84_P15207  | AT1G14120 | AT1G14120 | 0.40   | 0.72   | 1.20       | 1.61       | -0.97      | -0.98      | -0.53     | 0.02      |
| A_84_P590665 | AT1G22220 | AT1G22220 | -1.95  | -2.33  | -1.00      | -1.01      | -3.47      | -3.09      | -1.92     | -1.73     |
| A_84_P20933  | AT1G28610 | AT1G28610 | 2.48   | 2.48   | 3.50       | 3.40       | 1.87       | 1.54       | 3.03      | 2.46      |
| A_84_P14372  | AT1G31710 | AT1G31710 | 2.74   | 2.89   | 3.45       | 3.59       | 1.59       | 1.59       | 2.58      | 2.80      |
| A_84_P10418  | AT1G51440 | AT1G51440 | -0.37  | -0.31  | 0.26       | 0.44       | -1.01      | -0.93      | 0.23      | 0.20      |
| A_84_P807456 | AT1G54000 | AT1G54000 | 4.16   | 4.43   | 5.03       | 5.62       | 3.53       | 3.98       | 4.69      | 5.04      |
| A_84_P223359 | AT1G54000 | AT1G54000 | 0.74   | 0.59   | 1.59       | 1.49       | -0.29      | -1.28      | 0.98      | 0.12      |
| A_84_P807479 | AT1G54000 | AT1G54000 | 1.26   | 1.56   | 2.12       | 2.67       | 0.65       | 1.16       | 1.63      | 2.10      |
| A_84_P14146  | AT1G56680 | AT1G56680 | -3.13  | -1.51  | -1.37      | -0.59      | -4.73      | -4.33      | -4.45     | -2.31     |
| A_84_P753779 | AT1G61795 | AT1G61795 | -0.06  | -0.12  | 1.09       | 0.72       | -1.05      | -0.87      | 0.51      | -0.01     |
| A_84_P838837 | AT1G61795 | AT1G61795 | -0.45  | -0.50  | 0.64       | 0.24       | -1.43      | -1.19      | 0.05      | -0.37     |
| A_84_P23381  | AT1G62660 | AT1G62660 | 2.93   | 2.85   | 3.65       | 3.39       | 2.01       | 1.76       | 2.91      | 2.60      |
| A_84_P804822 | AT1G62660 | AT1G62660 | 2.22   | 2.08   | 2.91       | 2.73       | 1.35       | 0.98       | 2.29      | 1.90      |
| A_84_P12310  | AT1G76960 | AT1G76960 | -1.18  | -0.82  | 0.61       | 0.81       | -2.13      | -2.05      | -1.12     | -0.40     |
| A_84_P786557 | AT2G25510 | AT2G25510 | 3.31   | 2.81   | 4.07       | 4.41       | 2.46       | 2.06       | 3.72      | 3.64      |
| A_84_P60560  | AT2G25510 | AT2G25510 | 2.06   | 1.45   | 2.81       | 3.14       | 1.13       | 0.69       | 2.44      | 2.27      |
| A_84_P584694 | AT2G40390 | AT2G40390 | -2.34  | -2.40  | -1.23      | -1.67      | -3.52      | -3.48      | -2.11     | -2.46     |
| A_84_P22673  | AT2G40435 | AT2G40435 | -0.65  | 0.41   | 1.35       | 2.61       | -2.38      | -0.37      | -1.07     | -0.42     |
| A_84_P19250  | AT3G05400 | AT3G05400 | 0.08   | 0.32   | 0.76       | 1.16       | -0.93      | -0.50      | 0.76      | 1.36      |
| A_84_P113022 | AT3G05980 | AT3G05980 | 0.50   | 1.39   | 1.53       | 2.46       | -0.40      | 0.73       | 0.52      | 1.57      |
| A_84_P14561  | AT3G15720 | AT3G15720 | -0.20  | 0.28   | 0.70       | 0.87       | -2.02      | -1.27      | -0.48     | -0.03     |
| A_84_P12665  | AT3G16560 | AT3G16560 | 0.79   | 1.13   | 1.47       | 1.99       | -0.11      | 0.46       | 0.51      | 0.89      |
| A_84_P832673 | AT3G20340 | AT3G20340 | -1.13  | -1.45  | 0.01       | -0.73      | -2.35      | -3.08      | -0.80     | -1.94     |
| A_84_P529724 | AT3G20340 | AT3G20340 | -2.52  | -2.79  | -1.30      | -2.04      | -4.11      | -3.77      | -1.98     | -3.41     |
| A_84_P21186  | AT3G21670 | AT3G21670 | 0.74   | 0.21   | 2.29       | 1.55       | -0.76      | -1.67      | 1.09      | -0.48     |
| A_84_P18454  | AT3G54600 | AT3G54600 | 4.60   | 4.86   | 5.66       | 5.89       | 3.53       | 3.61       | 4.62      | 4.65      |
| A_84_P859998 | AT3G54600 | AT3G54600 | 0.74   | 0.97   | 1.98       | 2.22       | -0.32      | -0.23      | 0.94      | 0.96      |
| A_84_P760599 | AT3G55290 | AT3G55290 | 2.60   | 2.51   | 3.79       | 4.11       | 1.51       | 1.72       | 3.03      | 3.18      |
| A_84_P108872 | AT3G55290 | AT3G55290 | -4.59  | -4.33  | -2.81      | -2.52      | -4.94      | -4.75      | -3.65     | -3.73     |
| A_84_P15624  | AT3G56220 | AT3G56220 | -0.48  | 0.44   | 0.84       | 2.01       | -2.75      | -1.04      | -1.16     | -0.25     |
| A_84_P11858  | AT3G59710 | AT3G59710 | -1.75  | -1.92  | 0.05       | 0.35       | -2.80      | -2.51      | -0.56     | -0.36     |
| A_84_P173441 | AT3G61920 | AT3G61920 | -1.12  | 0.16   | 1.87       | 2.80       | -2.46      | -1.26      | 0.41      | 1.00      |
| A_84_P64634  | AT4G10910 | AT4G10910 | -0.83  | -0.48  | 0.20       | 0.27       | -3.95      | -3.40      | -2.66     | -3.26     |
| A_84_P11909  | AT4G11210 | AT4G11210 | -0.42  | -0.09  | 0.49       | 0.77       | -1.86      | -1.45      | -0.96     | -0.99     |
| A_84_P851624 | AT4G11320 | AT4G11320 | 2.89   | 4.24   | 5.22       | 5.84       | 1.08       | 2.15       | 3.60      | 4.24      |
| A_84_P20420  | AT4G11320 | AT4G11320 | -0.14  | 1.26   | 2.42       | 2.96       | -2.11      | -0.82      | 0.70      | 1.32      |
| A_84_P133775 | AT4G16563 | AT4G16563 | -0.02  | -0.08  | 1.62       | 0.94       | -0.62      | -1.44      | 0.54      | -0.30     |
| A_84_P12890  | AT4G24050 | AT4G24050 | 0.57   | 0.57   | 1.87       | 1.85       | -0.82      | -0.81      | 0.63      | 0.78      |
| A_84_P15849  | AT5G11930 | AT5G11930 | -1.21  | -0.74  | 0.33       | 0.87       | -3.02      | -2.96      | -1.85     | -1.53     |
| A_84_P13968  | AT5G16410 | AT5G16410 | -2.29  | -2.93  | -1.34      | -2.10      | -3.62      | -3.56      | -2.34     | -3.09     |
| A_84_P12086  | AT5G19100 | AT5G19100 | -1.90  | -1.60  | -0.95      | -0.19      | -2.76      | -2.21      | -1.59     | -1.29     |
| A_84_P831635 | AT5G19100 | AT5G19100 | -4.13  | -3.53  | -3.40      | -2.98      | -4.65      | -4.90      | -3.53     | -3.24     |
| A_84_P14951  | AT5G38020 | AT5G38020 | -1.66  | -0.72  | 0.65       | 1.26       | -2.80      | -3.13      | -1.35     | -1.07     |
| A_84_P768857 | AT5G44572 | AT5G44572 | 1.63   | 1.67   | 2.66       | 2.50       | 0.22       | 0.46       | 1.29      | 1.64      |
| A_84_P528334 | AT5G50915 | AT5G50915 | 1.17   | 1.56   | 2.07       | 2.21       | 0.32       | 0.92       | 1.51      | 1.43      |
| A_84_P825374 | AT5G50915 | AT5G50915 | 1.00   | 1.37   | 1.97       | 1.98       | 0.03       | 0.72       | 1.31      | 1.24      |
| A_84_P784157 | AT5G50915 | AT5G50915 | 0.24   | 0.61   | 1.32       | 1.31       | -0.53      | -0.09      | 0.65      | 0.53      |
| A_84_P15040  | AT5G61660 | AT5G61660 | 3.34   | 3.64   | 4.22       | 4.47       | 2.67       | 3.02       | 3.80      | 4.20      |
| A_84_P18081  | ATL8      | AT1G76410 | 1.75   | 1.55   | 3.07       | 2.97       | 0.07       | 0.42       | 1.40      | 1.92      |
| A_84_P308073 | BAT5      | AT4G12030 | 2.69   | 2.82   | 3.76       | 3.84       | 1.94       | 1.82       | 2.91      | 2.73      |
| A_84_P824563 | BAT5      | AT4G12030 | 1.80   | 1.98   | 2.91       | 3.16       | 0.99       | 0.90       | 1.98      | 1.84      |
| A_84_P846050 | BAT5      | AT4G12030 | 0.99   | 1.07   | 2.05       | 2.28       | 0.13       | 0.01       | 1.15      | 0.95      |
| A_84_P17435  | BCAT4     | AT3G19710 | 2.48   | 2.84   | 4.53       | 4.73       | 1.56       | 1.49       | 3.49      | 3.87      |
| A_84_P20230  | BGLU40    | AT1G26560 | 2.70   | 2.59   | 3.38       | 3.49       | 1.88       | 1.84       | 2.88      | 2.64      |
| A_84_P22576  | CUC2      | AT5G53950 | -0.44  | 0.15   | 0.86       | 1.26       | -1.90      | -1.10      | -0.72     | 0.14      |
| A_84_P23757  | CUC3      | AT1G76420 | 0.53   | 0.86   | 2.13       | 2.73       | -0.81      | -0.54      | -0.23     | 0.58      |
| A_84_P20172  | CYP710A2  | AT2G34490 | 2.86   | 3.15   | 3.52       | 3.93       | 1.40       | 1.97       | 2.59      | 2.71      |
| A_84_P15293  | CYP78A5   | AT1G13710 | 3.68   | 4.28   | 4.42       | 4.90       | 2.81       | 3.42       | 3.19      | 4.22      |
| A_84_P90469  | CYP79F1   | AT1G16410 | 1.88   | 2.28   | 4.01       | 4.28       | 1.15       | 1.22       | 3.28      | 3.59      |
| A_84_P752590 | CYP79F1   | AT1G16410 | 0.90   | 1.40   | 3.21       | 3.38       | 0.17       | 0.25       | 2.26      | 2.54      |
| A_84_P19484  | CYP83A1   | AT4G13770 | 5.22   | 5.31   | 6.27       | 6.37       | 4.43       | 4.32       | 5.62      | 5.50      |
| A_84_P17806  | DFR       | AT5G42800 | 4.36   | 4.83   | 5.73       | 5.77       | 3.68       | 4.17       | 5.28      | 4.93      |
| A_84_P845171 | DFR       | AT5G42800 | 3.69   | 3.90   | 4.95       | 4.92       | 2.95       | 3.50       | 4.56      | 4.17      |
| A_84_P16271  | DR4       | AT1G73330 | -1.53  | -0.81  | 2.55       | 2.52       | -3.33      | -3.00      | 1.38      | 1.54      |
| A_84_P856876 | DR4       | AT1G73330 | -2.32  | -1.86  | 1.70       | 1.47       | -4.16      | -4.17      | 0.45      | 0.64      |
| A_84_P11452  | ENODL6    | AT1G48940 | -3.52  | -3.02  | -2.34      | -2.11      | -4.56      | -3.72      | -2.35     | -2.00     |
| A_84_P22126  | FAO3      | AT3G23410 | 3.51   | 3.14   | 4.26       | 4.33       | 2.45       | 2.32       | 3.61      | 3.17      |

|              |            |           |       |       |       |       |       |       |       |       |
|--------------|------------|-----------|-------|-------|-------|-------|-------|-------|-------|-------|
| A_84_P21842  | FMO GS-OX1 | AT1G65860 | 0.75  | 1.08  | 1.69  | 2.07  | 0.15  | 0.09  | 0.77  | 1.10  |
| A_84_P17028  | FMO GS-OX3 | AT1G62560 | 1.67  | 1.96  | 3.05  | 3.20  | 0.69  | 0.40  | 1.60  | 1.62  |
| A_84_P760097 | GRF4       | AT3G52910 | 2.83  | 3.24  | 3.43  | 4.02  | 1.91  | 2.48  | 2.39  | 3.04  |
| A_84_P20210  | GSTF11     | AT3G03190 | 1.70  | 2.35  | 2.59  | 2.98  | 0.90  | 0.58  | 1.39  | 1.48  |
| A_84_P23070  | HMT3       | AT3G22740 | -1.20 | -0.55 | 2.71  | 3.14  | -1.94 | -3.03 | 1.10  | 1.33  |
| A_84_P813440 | IMD1       | AT5G14200 | 7.04  | 7.11  | 7.48  | 7.57  | 6.69  | 6.75  | 6.99  | 7.24  |
| A_84_P237883 | IMD1       | AT5G14200 | 4.35  | 4.46  | 5.54  | 5.54  | 3.67  | 3.47  | 4.70  | 4.85  |
| A_84_P22256  | IPM11      | AT3G58990 | 2.03  | 2.22  | 3.31  | 3.79  | 1.13  | 1.07  | 2.23  | 2.29  |
| A_84_P14423  | IPM12      | AT2G43100 | 4.67  | 4.81  | 5.97  | 6.08  | 4.01  | 3.87  | 5.25  | 5.51  |
| A_84_P10711  | JAL23      | AT2G39330 | 0.43  | -0.69 | 3.56  | 3.60  | -0.91 | -1.28 | 2.16  | 1.60  |
| A_84_P22784  | KNATM      | AT1G14760 | -1.30 | -1.04 | -0.48 | -0.22 | -1.94 | -1.85 | -1.03 | -0.80 |
| A_84_P861444 | KNATM      | AT1G14760 | -0.55 | -0.21 | 0.39  | 0.55  | -1.45 | -1.07 | -0.57 | -0.05 |
| A_84_P15870  | MAM1       | AT5G23010 | 4.54  | 4.78  | 6.07  | 6.21  | 3.28  | 3.19  | 5.20  | 5.35  |
| A_84_P784686 | MAM1       | AT5G23010 | 4.02  | 4.20  | 5.72  | 5.77  | 2.88  | 2.66  | 4.73  | 4.97  |
| A_84_P813383 | MAM1       | AT5G23010 | 3.81  | 3.98  | 5.50  | 5.56  | 2.55  | 2.55  | 4.47  | 4.74  |
| A_84_P22219  | MES10      | AT3G50440 | 4.59  | 4.77  | 6.18  | 6.22  | 3.15  | 3.18  | 4.71  | 4.59  |
| A_84_P787846 | MES10      | AT3G50440 | 3.76  | 3.87  | 5.42  | 5.41  | 2.27  | 2.26  | 3.83  | 3.77  |
| A_84_P13475  | MGDC       | AT2G11810 | -2.45 | -1.97 | -1.31 | -1.34 | -3.95 | -4.28 | -2.19 | -2.49 |
| A_84_P189624 | MLP43      | AT1G70890 | 3.72  | 4.47  | 5.23  | 5.74  | 3.09  | 3.58  | 4.70  | 5.31  |
| A_84_P18673  | MYB29      | AT5G07690 | 0.95  | 1.83  | 2.24  | 2.69  | -1.01 | -0.79 | 0.21  | 0.49  |
| A_84_P14086  | MYB59      | AT5G59780 | -0.30 | -1.22 | 0.32  | 0.12  | -1.39 | -3.69 | -2.01 | -2.50 |
| A_84_P14184  | NAC1       | AT1G56010 | -1.00 | -1.23 | -0.40 | -0.46 | -3.51 | -3.37 | -2.85 | -2.85 |
| A_84_P13815  | NLM1       | AT4G19030 | -2.95 | -1.41 | 0.14  | 1.31  | -4.02 | -2.25 | -0.59 | 0.39  |
| A_84_P11475  | PAP3       | AT1G14700 | 3.60  | 3.70  | 4.38  | 4.36  | 3.00  | 3.17  | 4.01  | 3.83  |
| A_84_P786909 | PAP3       | AT1G14700 | 3.18  | 3.37  | 4.07  | 3.96  | 2.46  | 2.71  | 3.63  | 3.44  |
| A_84_P20170  | PAP8       | AT2G01890 | 1.84  | 1.78  | 4.54  | 3.83  | -0.01 | 0.40  | 3.44  | 2.52  |
| A_84_P823859 | PAP8       | AT2G01890 | 0.59  | 0.59  | 3.27  | 2.54  | -1.06 | -0.84 | 2.17  | 1.26  |
| A_84_P11091  | PLL2       | AT5G02400 | -3.01 | -2.87 | -2.13 | -2.18 | -3.92 | -4.32 | -3.47 | -3.15 |
| A_84_P23050  | PR4        | AT3G04720 | 2.86  | 2.40  | 3.77  | 4.07  | 1.49  | 0.34  | 2.62  | 2.44  |
| A_84_P10135  | ROT3       | AT4G36380 | -1.04 | -0.68 | 0.05  | 0.36  | -2.14 | -1.67 | -1.10 | -1.10 |
| A_84_P717671 | RTFL6      | AT4G35783 | -1.68 | -2.29 | -1.10 | -1.29 | -3.45 | -3.70 | -2.90 | -2.97 |
| A_84_P764921 | RTFL6      | AT4G35783 | -1.83 | -2.32 | -1.16 | -1.33 | -3.63 | -3.79 | -2.70 | -3.26 |
| A_84_P284250 | SFP2       | AT5G27360 | -1.03 | -0.95 | 0.37  | 0.39  | -2.20 | -2.14 | -0.79 | -0.60 |
| A_84_P19052  | TAA1       | AT1G70560 | 4.07  | 4.00  | 4.73  | 5.09  | 2.57  | 2.73  | 3.88  | 4.31  |
| A_84_P751365 | TLL1       | AT1G45201 | 4.59  | 4.83  | 5.75  | 6.14  | 3.37  | 3.96  | 4.91  | 4.85  |
| A_84_P507242 | TLL1       | AT1G45201 | 2.69  | 2.90  | 3.79  | 4.18  | 1.52  | 2.03  | 2.98  | 2.94  |
| A_84_P116602 | WOL        | AT2G01830 | 2.01  | 2.42  | 2.95  | 3.20  | 1.04  | 1.52  | 1.69  | 1.91  |
| A_84_P784848 | WOL        | AT2G01830 | -0.21 | 0.42  | 0.95  | 1.27  | -0.84 | -0.58 | -0.25 | -0.04 |
| A_84_P22412  | WRKY13     | AT4G39410 | -1.76 | -1.06 | -0.85 | -0.29 | -2.52 | -1.92 | -1.32 | -0.91 |
| A_84_P544339 | XND1       | AT5G64530 | -0.83 | -1.07 | 0.55  | 0.28  | -1.65 | -1.95 | -0.18 | -0.69 |
| A_84_P18684  | YUC4       | AT5G11320 | -0.16 | 0.54  | 0.54  | 1.37  | -1.65 | -1.54 | -1.99 | -0.35 |
| A_84_P767924 | YUC4       | AT5G11320 | -0.61 | -0.10 | -0.04 | 0.88  | -2.39 | -2.17 | -2.09 | -0.92 |
| A_84_P591116 | ZPR2       | AT3G60890 | -1.24 | -0.98 | 0.11  | 0.42  | -2.22 | -1.99 | -0.99 | -0.23 |
| A_84_P13717  | ZPR3       | AT3G52770 | -1.28 | -1.11 | -0.07 | 0.10  | -2.12 | -1.77 | -0.57 | 0.21  |

**Table S4. List of log<sub>2</sub> expression level of DEX-down-IAA-up genes (>1.5-fold)**

| ProbeName    | GeneName  | AGI code  | EtOH_1 | EtOH_2 | DEX+EtOH_1 | DEX+EtOH_2 | EtOH+IAA_1 | EtOH+IAA_2 | DEX+IAA_1 | DEX+IAA_2 |
|--------------|-----------|-----------|--------|--------|------------|------------|------------|------------|-----------|-----------|
| A_84_P52180  | AGL8      | AT5G60910 | -2.43  | -2.01  | -3.81      | -2.61      | -1.05      | -0.92      | -1.51     | -1.36     |
| A_84_P821066 | AGL8      | AT5G60910 | -2.68  | -2.19  | -4.36      | -2.83      | -1.09      | -1.26      | -2.02     | -1.87     |
| A_84_P208088 | AGP4      | AT5G10430 | 4.03   | 3.99   | 2.89       | 2.64       | 4.73       | 4.86       | 3.73      | 3.78      |
| A_84_P851051 | AGP4      | AT5G10430 | 0.97   | 1.00   | -0.27      | -0.26      | 1.73       | 1.96       | 0.75      | 0.96      |
| A_84_P524502 | ARGOS     | AT3G59900 | 4.31   | 3.98   | 2.50       | 1.39       | 5.30       | 5.08       | 4.35      | 4.39      |
| A_84_P18985  | AT1G11740 | AT1G11740 | -1.30  | -1.00  | -2.37      | -2.03      | 0.39       | 0.69       | -0.63     | -0.53     |
| A_84_P751955 | AT1G12080 | AT1G12080 | 4.53   | 5.29   | 2.72       | 3.37       | 5.62       | 5.95       | 4.48      | 4.86      |
| A_84_P848382 | AT1G12080 | AT1G12080 | 4.26   | 4.81   | 2.48       | 3.13       | 5.34       | 5.64       | 4.19      | 4.58      |
| A_84_P807614 | AT1G12080 | AT1G12080 | 2.41   | 2.97   | 0.49       | 1.30       | 3.42       | 3.81       | 2.27      | 2.71      |
| A_84_P603116 | AT1G13670 | AT1G13670 | -0.36  | -0.27  | -2.70      | -2.52      | 1.37       | 1.29       | 0.41      | 1.02      |
| A_84_P22857  | AT1G18020 | AT1G17990 | 3.98   | 3.07   | 2.10       | 0.95       | 5.08       | 4.04       | 3.09      | 2.22      |
| A_84_P803569 | AT1G18020 | AT1G18020 | 3.15   | 2.21   | 1.32       | 0.08       | 4.19       | 3.19       | 2.29      | 1.39      |
| A_84_P853555 | AT1G18020 | AT1G18020 | 1.53   | 0.40   | -0.29      | -1.57      | 2.45       | 1.52       | 0.55      | -0.44     |
| A_84_P23662  | AT1G23040 | AT1G23040 | 2.49   | 2.51   | 1.66       | 1.65       | 3.28       | 3.30       | 2.50      | 2.59      |
| A_84_P858244 | AT1G23040 | AT1G23040 | -1.10  | -1.30  | -1.87      | -1.75      | -0.22      | -0.25      | -0.97     | -0.87     |
| A_84_P279980 | AT1G29440 | AT1G29440 | 2.24   | 2.37   | -1.90      | -1.75      | 3.68       | 3.48       | 2.19      | 2.26      |
| A_84_P19713  | AT1G29450 | AT1G29450 | 1.12   | 1.36   | -2.44      | -2.20      | 2.78       | 2.66       | 1.84      | 1.79      |
| A_84_P15930  | AT1G29460 | AT1G29460 | -0.23  | 0.14   | -4.86      | -3.65      | 1.92       | 1.98       | 1.09      | 1.34      |
| A_84_P754333 | AT1G29465 | AT1G29465 | 4.46   | 4.25   | 3.55       | 3.31       | 5.14       | 5.01       | 4.78      | 4.56      |
| A_84_P843096 | AT1G29490 | AT1G29490 | -2.42  | -2.09  | -3.63      | -4.72      | 1.40       | 1.31       | 0.62      | 0.75      |
| A_84_P11207  | AT1G29500 | AT1G29500 | 1.56   | 1.55   | -0.20      | 0.18       | 3.14       | 3.00       | 2.43      | 2.39      |
| A_84_P16068  | AT1G33790 | AT1G33790 | 2.86   | 2.87   | 1.22       | 0.83       | 3.88       | 4.04       | 2.26      | 2.27      |
| A_84_P13577  | AT1G36940 | AT1G36940 | 2.17   | 1.86   | 1.42       | 1.15       | 3.13       | 3.15       | 2.65      | 2.76      |
| A_84_P19990  | AT1G68810 | AT1G68810 | 0.78   | 0.83   | -0.90      | -0.32      | 1.81       | 1.68       | 0.68      | 0.49      |
| A_84_P19196  | AT1G75490 | AT1G75490 | 1.05   | -0.31  | 0.11       | -1.31      | 1.84       | 1.14       | 1.80      | 1.18      |
| A_84_P795438 | AT1G75490 | AT1G75490 | -3.52  | -4.98  | -2.52      | -4.94      | -2.57      | -3.10      | -2.90     | -3.48     |
| A_84_P118432 | AT1G78100 | AT1G78100 | 2.66   | 2.57   | 1.72       | 1.70       | 3.60       | 3.71       | 3.04      | 3.09      |
| A_84_P758488 | AT2G18969 | AT2G18969 | 1.11   | 1.36   | -0.40      | -0.18      | 2.74       | 2.89       | 1.41      | 1.63      |
| A_84_P595309 | AT2G18970 | AT2G18970 | -3.14  | -2.68  | -4.40      | -4.66      | -1.53      | -1.29      | -2.96     | -2.67     |
| A_84_P136225 | AT2G32560 | AT2G32560 | 2.70   | 2.72   | 0.29       | 0.13       | 3.44       | 3.70       | 2.57      | 2.57      |
| A_84_P835471 | AT2G34080 | AT2G34080 | 0.00   | -0.43  | -1.29      | -2.03      | 0.72       | 0.77       | -0.25     | -0.57     |
| A_84_P17235  | AT2G34080 | AT2G34080 | -0.72  | -1.18  | -1.98      | -3.25      | -0.04      | -0.02      | -1.01     | -1.28     |
| A_84_P21046  | AT2G38600 | AT2G38600 | -3.96  | -3.40  | -4.62      | -4.97      | -2.19      | -2.21      | -3.67     | -3.76     |
| A_84_P13439  | AT2G39980 | AT2G39980 | 5.22   | 4.28   | 3.59       | 2.55       | 6.52       | 6.29       | 5.32      | 5.12      |
| A_84_P196604 | AT2G40530 | AT2G40530 | -1.23  | -1.04  | -2.36      | -2.03      | -0.20      | 0.14       | -1.04     | -0.84     |
| A_84_P173611 | AT2G41170 | AT2G41170 | 0.81   | 0.71   | 0.06       | -0.13      | 2.07       | 1.89       | 1.36      | 1.25      |
| A_84_P297904 | AT2G41230 | AT2G41230 | 4.84   | 3.53   | 4.05       | 2.17       | 5.78       | 5.48       | 5.85      | 5.78      |
| A_84_P795880 | AT2G41231 | AT2G41231 | 0.16   | -1.07  | -0.68      | -2.28      | 0.95       | 0.80       | 1.13      | 1.14      |
| A_84_P160753 | AT2G41800 | AT2G41800 | -2.08  | -0.34  | -3.53      | -2.17      | 0.59       | 1.52       | -0.66     | 0.02      |
| A_84_P757973 | AT2G44578 | AT2G44578 | -1.82  | -2.39  | -2.52      | -3.52      | -0.09      | -0.98      | -0.94     | -1.60     |
| A_84_P21135  | AT3G03820 | AT3G03820 | 0.97   | 1.34   | 0.12       | 0.11       | 2.49       | 2.38       | 1.75      | 1.85      |
| A_84_P20189  | AT3G03830 | AT3G03830 | -0.86  | -0.56  | -2.18      | -2.02      | 1.41       | 1.37       | 0.69      | 0.87      |
| A_84_P18297  | AT3G03840 | AT3G03840 | -2.85  | -2.45  | -3.64      | -3.29      | -0.96      | -1.09      | -1.60     | -1.15     |
| A_84_P554482 | AT3G03850 | AT3G03850 | -0.67  | -0.31  | -1.95      | -1.71      | 1.12       | 1.10       | 0.57      | 0.87      |
| A_84_P20213  | AT3G04000 | AT3G04000 | 3.47   | 1.70   | 2.05       | 0.89       | 4.13       | 2.29       | 2.45      | 0.93      |
| A_84_P793541 | AT3G04000 | AT3G04000 | 1.20   | -0.67  | -0.17      | -1.21      | 1.95       | 0.07       | 0.35      | -1.19     |
| A_84_P18298  | AT3G05150 | AT3G05150 | -1.87  | -1.86  | -3.40      | -2.55      | -0.79      | -0.51      | -0.93     | -0.76     |
| A_84_P832301 | AT3G05150 | AT3G05150 | -2.97  | -2.55  | -3.37      | -3.33      | -1.47      | -1.25      | -1.74     | -1.36     |
| A_84_P14558  | AT3G22820 | AT3G22820 | 0.29   | 0.22   | -1.48      | -1.69      | 1.27       | 1.06       | 0.14      | 0.01      |
| A_84_P21181  | AT3G26760 | AT3G26760 | 0.26   | 0.75   | -1.83      | -0.99      | 1.78       | 2.16       | 0.89      | 1.32      |
| A_84_P558998 | AT3G42800 | AT3G42800 | -0.69  | -0.22  | -1.92      | -1.21      | 1.07       | 1.19       | 0.86      | 1.17      |
| A_84_P17461  | AT3G43430 | AT3G43430 | 1.15   | -1.17  | -0.33      | -0.93      | 1.84       | 1.99       | 0.70      | 0.84      |
| A_84_P860746 | AT3G47510 | AT3G47510 | 0.90   | 0.80   | -0.69      | -0.77      | 2.18       | 2.26       | 1.22      | 1.08      |
| A_84_P556364 | AT3G47510 | AT3G47510 | -1.03  | -1.02  | -2.59      | -2.90      | 0.37       | 0.35       | -0.73     | -0.64     |
| A_84_P509388 | AT3G52520 | AT3G52520 | -3.31  | -3.70  | -4.04      | -4.40      | -2.14      | -2.86      | -2.87     | -4.48     |
| A_84_P13751  | AT3G60490 | AT3G60490 | -0.13  | -0.22  | -1.28      | -1.49      | 0.47       | 0.54       | -0.52     | -0.39     |
| A_84_P20398  | AT4G03140 | AT4G03140 | 1.21   | 0.97   | -1.15      | -0.70      | 3.27       | 3.26       | 1.46      | 1.79      |
| A_84_P848192 | AT4G03140 | AT4G03140 | -2.04  | -1.99  | -4.06      | -4.15      | 0.31       | 0.42       | -1.47     | -1.17     |
| A_84_P19468  | AT4G09890 | AT4G09890 | 2.68   | 2.91   | 1.37       | 1.79       | 3.65       | 3.80       | 3.06      | 3.10      |
| A_84_P764623 | AT4G15248 | AT4G15248 | -0.37  | -1.64  | -1.04      | -2.44      | 1.62       | 0.19       | 0.47      | -0.80     |
| A_84_P572494 | AT4G28703 | AT4G28703 | -0.31  | -0.33  | -1.36      | -1.89      | 1.50       | 1.06       | -0.32     | -0.27     |
| A_84_P787406 | AT4G28703 | AT4G28703 | -0.84  | -0.78  | -1.97      | -2.30      | 0.88       | 0.53       | -1.07     | -0.80     |
| A_84_P831098 | AT4G33800 | AT4G33800 | -2.72  | -2.74  | -3.97      | -3.53      | -2.11      | -1.68      | -2.37     | -1.93     |
| A_84_P222749 | AT4G33800 | AT4G33800 | -2.69  | -2.56  | -3.62      | -3.44      | -1.93      | -1.84      | -2.38     | -2.04     |
| A_84_P21449  | AT4G34770 | AT4G34770 | 3.51   | 3.58   | 0.84       | 0.55       | 4.21       | 4.30       | 3.29      | 3.55      |
| A_84_P13885  | AT4G35190 | AT4G35190 | -0.18  | -0.52  | -2.35      | -1.81      | 0.56       | 0.33       | -0.79     | -0.67     |
| A_84_P797355 | AT4G36110 | AT4G36110 | 0.15   | 0.57   | -1.19      | -0.81      | 1.26       | 1.15       | 0.72      | 0.87      |
| A_84_P17680  | AT4G38860 | AT4G38860 | 1.12   | 1.02   | 0.03       | -0.01      | 1.99       | 1.98       | 1.77      | 1.78      |
| A_84_P768708 | AT5G01210 | AT5G01215 | -1.24  | -0.87  | -1.31      | -0.53      | -0.50      | -0.18      | -0.17     | 0.03      |
| A_84_P707180 | AT5G01210 | AT5G01215 | -2.00  | -1.97  | -2.45      | -2.20      | -1.54      | -1.17      | -1.59     | -1.24     |
| A_84_P17703  | AT5G01210 | AT5G01210 | 5.09   | 4.96   | 4.35       | 3.86       | 6.11       | 6.14       | 6.13      | 6.16      |
| A_84_P22435  | AT5G01740 | AT5G01740 | 2.88   | 2.14   | 0.57       | -0.26      | 4.44       | 4.46       | 2.78      | 2.60      |



|              |           |           |       |       |       |       |       |       |       |       |
|--------------|-----------|-----------|-------|-------|-------|-------|-------|-------|-------|-------|
| A_84_P16764  | AT5G02750 | AT5G02750 | 0.22  | 0.26  | -1.55 | -2.12 | 1.12  | 1.11  | -0.15 | -0.21 |
| A_84_P17710  | AT5G02760 | AT5G02760 | 4.79  | 4.16  | 2.90  | 2.86  | 6.95  | 7.20  | 6.86  | 6.90  |
| A_84_P172771 | AT5G06930 | AT5G06930 | 0.95  | 1.09  | 0.11  | 0.19  | 1.84  | 1.82  | 1.46  | 1.59  |
| A_84_P831040 | AT5G06930 | AT5G06930 | -2.98 | -2.76 | -3.52 | -3.41 | -2.22 | -2.06 | -2.44 | -2.42 |
| A_84_P196504 | AT5G18010 | AT5G18010 | -0.05 | 0.40  | -2.55 | -1.91 | 2.29  | 2.47  | 1.41  | 1.60  |
| A_84_P147028 | AT5G18020 | AT5G18020 | 0.26  | 0.87  | -1.04 | -0.94 | 2.40  | 2.44  | 1.94  | 2.01  |
| A_84_P152798 | AT5G18030 | AT5G18030 | 0.62  | 1.06  | -0.67 | -0.40 | 2.88  | 2.98  | 2.53  | 2.64  |
| A_84_P141269 | AT5G18050 | AT5G18050 | 1.07  | 1.68  | -0.27 | -0.01 | 3.74  | 3.93  | 3.20  | 3.41  |
| A_84_P94979  | AT5G18060 | AT5G18060 | 0.68  | 0.86  | -0.69 | -0.59 | 2.95  | 3.05  | 2.45  | 2.59  |
| A_84_P272980 | AT5G18080 | AT5G18080 | 0.38  | 0.93  | -0.72 | -0.96 | 2.89  | 3.01  | 2.47  | 2.54  |
| A_84_P79425  | AT5G20820 | AT5G20820 | 2.17  | 2.33  | 0.85  | 0.94  | 3.52  | 3.69  | 2.66  | 3.08  |
| A_84_P824903 | AT5G22460 | AT5G22460 | 1.56  | 1.60  | 0.40  | 0.32  | 2.21  | 2.20  | 2.07  | 1.53  |
| A_84_P167453 | AT5G22460 | AT5G22460 | 0.96  | 0.95  | -0.32 | -0.37 | 1.65  | 1.55  | 1.35  | 0.94  |
| A_84_P824908 | AT5G22460 | AT5G22460 | -2.82 | -2.49 | -3.43 | -4.04 | -1.76 | -1.90 | -2.06 | -2.69 |
| A_84_P13987  | AT5G25190 | AT5G25190 | 3.01  | 2.84  | 0.84  | 0.74  | 4.33  | 4.35  | 3.20  | 3.27  |
| A_84_P194934 | AT5G52870 | AT5G52870 | 3.24  | 3.15  | 2.37  | 2.27  | 3.91  | 3.97  | 3.57  | 3.51  |
| A_84_P214628 | AT5G52900 | AT5G52900 | 1.71  | 0.53  | -1.35 | -1.02 | 4.17  | 3.88  | 4.12  | 3.38  |
| A_84_P507058 | AT5G57760 | AT5G57760 | 5.23  | 4.51  | 3.37  | 2.18  | 5.92  | 6.27  | 5.49  | 5.42  |
| A_84_P789543 | AT5G57760 | AT5G57760 | 4.05  | 3.30  | 2.13  | 1.08  | 4.78  | 5.01  | 4.27  | 4.23  |
| A_84_P23538  | AT5G58620 | AT5G58620 | 0.92  | 0.75  | 0.23  | 0.06  | 1.67  | 1.41  | 1.22  | 1.12  |
| A_84_P79759  | AT5G62280 | AT5G62280 | 0.75  | -0.79 | -2.07 | -2.03 | 3.43  | 3.16  | 3.53  | 3.24  |
| A_84_P54620  | AT5G64780 | AT5G64780 | 0.70  | 0.29  | -1.10 | -0.93 | 1.37  | 1.28  | 0.46  | 0.60  |
| A_84_P14971  | ATAUX2-11 | AT5G43700 | 3.59  | 3.58  | 2.73  | 2.82  | 4.55  | 4.78  | 4.32  | 4.45  |
| A_84_P818769 | ATAUX2-11 | AT5G43700 | 1.60  | 1.61  | 0.73  | 0.79  | 2.55  | 2.83  | 2.30  | 2.46  |
| A_84_P20866  | AXR3      | AT1G04250 | 3.82  | 3.80  | 2.93  | 2.79  | 4.63  | 4.70  | 4.28  | 4.33  |
| A_84_P838052 | AXR3      | AT1G04250 | 1.47  | 1.55  | 0.61  | 0.52  | 2.26  | 2.34  | 1.84  | 1.99  |
| A_84_P18482  | BRH1      | AT3G61460 | 5.33  | 5.27  | 4.61  | 4.67  | 6.12  | 6.32  | 5.92  | 5.90  |
| A_84_P22483  | CAX7      | AT5G17860 | 3.85  | 2.96  | 3.22  | 1.49  | 4.85  | 3.93  | 4.03  | 2.59  |
| A_84_P592126 | CCD8      | AT4G32810 | -2.62 | -2.91 | -4.62 | -4.11 | -0.72 | -1.03 | -1.65 | -2.27 |
| A_84_P14421  | CKX1      | AT2G41510 | -1.81 | -1.55 | -3.71 | -2.52 | -0.27 | -0.26 | -1.67 | -1.85 |
| A_84_P302670 | CLE22     | AT5G12235 | -1.61 | -1.54 | -2.45 | -2.43 | -0.84 | -0.65 | -1.29 | -1.24 |
| A_84_P762938 | DQ108837  | AT4G22545 | -2.24 | -2.01 | -3.79 | -3.66 | -0.62 | -0.58 | -1.38 | -1.53 |
| A_84_P762938 | DQ108837  | AT4G22545 | -2.04 | -2.22 | -4.22 | -4.40 | -0.53 | -0.52 | -1.65 | -1.41 |
| A_84_P762938 | DQ108837  | AT4G22545 | -2.15 | -1.98 | -4.50 | -4.13 | -0.53 | -0.51 | -1.87 | -1.60 |
| A_84_P762938 | DQ108837  | AT4G22545 | -2.13 | -2.17 | -4.41 | -4.74 | -0.51 | -0.57 | -1.79 | -1.38 |
| A_84_P762938 | DQ108837  | AT4G22545 | -2.60 | -2.12 | -4.19 | -4.48 | -0.61 | -0.80 | -1.97 | -1.75 |
| A_84_P298034 | ENODL18   | AT1G08500 | 0.30  | 0.44  | -0.35 | -0.74 | 0.93  | 1.17  | 0.15  | 0.14  |
| A_84_P23714  | ESC       | AT1G20900 | 1.71  | 1.55  | -0.49 | -0.59 | 3.47  | 3.64  | 2.21  | 2.48  |
| A_84_P806966 | EXPA8     | AT2G40610 | 2.55  | 2.61  | 1.18  | 1.33  | 3.41  | 3.59  | 2.92  | 3.32  |
| A_84_P11569  | EXPA8     | AT2G40610 | 1.80  | 1.87  | 0.55  | 0.74  | 2.70  | 2.96  | 2.27  | 2.67  |
| A_84_P788919 | EXPA8     | AT2G40610 | -2.74 | -2.55 | -3.94 | -3.83 | -1.83 | -1.53 | -2.01 | -1.60 |
| A_84_P16678  | GA200X1   | AT4G25420 | -0.88 | -0.57 | -1.97 | -2.01 | 1.52  | 1.81  | 1.41  | 1.53  |
| A_84_P18218  | HB17      | AT2G01430 | -2.76 | -2.63 | -3.66 | -3.48 | 0.45  | 0.38  | -0.29 | -0.81 |
| A_84_P14556  | IAA19     | AT3G15540 | 1.15  | 0.96  | -1.18 | -0.12 | 5.74  | 5.81  | 5.12  | 5.25  |
| A_84_P820504 | IAA2      | AT3G23030 | 5.32  | 4.83  | 2.96  | 2.56  | 7.94  | 7.72  | 7.64  | 7.40  |
| A_84_P19308  | IAA2      | AT3G23030 | 2.76  | 2.21  | 0.56  | 0.13  | 5.47  | 5.25  | 5.23  | 5.01  |
| A_84_P55550  | IAA29     | AT4G32280 | -1.01 | -1.85 | -2.92 | -2.75 | 4.74  | 4.55  | 4.82  | 4.59  |
| A_84_P13379  | IAA6      | AT1G52830 | -1.95 | -1.25 | -4.33 | -4.11 | 2.23  | 1.99  | 0.66  | -0.11 |
| A_84_P761007 | IAA7      | AT3G23050 | 5.01  | 4.95  | 4.24  | 4.23  | 6.69  | 6.80  | 6.50  | 6.51  |
| A_84_P760471 | IAA7      | AT3G23050 | -2.81 | -2.78 | -2.77 | -3.27 | -0.60 | -0.79 | -0.73 | -0.93 |
| A_84_P544465 | KDR       | AT1G26945 | 3.64  | 3.22  | 1.13  | 1.35  | 6.53  | 6.43  | 5.63  | 5.77  |
| A_84_P789302 | KDR       | AT1G26945 | -1.12 | -1.43 | -2.84 | -3.10 | 1.96  | 1.99  | 1.07  | 1.27  |
| A_84_P16293  | LAC6      | AT2G46570 | -0.55 | -0.44 | -2.16 | -1.16 | 1.52  | 1.36  | 0.74  | 0.17  |
| A_84_P15136  | LRX2      | AT1G62440 | -3.27 | -3.19 | -3.95 | -4.26 | -1.31 | -2.09 | -3.07 | -3.13 |
| A_84_P10579  | LUP1      | AT1G78970 | 2.74  | 2.67  | 1.34  | 1.16  | 4.30  | 4.20  | 3.54  | 3.49  |
| A_84_P174971 | NPY5      | AT4G37590 | 3.59  | 3.60  | 2.50  | 2.79  | 4.42  | 4.38  | 3.88  | 3.80  |
| A_84_P784468 | NPY5      | AT4G37590 | 3.68  | 3.72  | 2.65  | 3.03  | 4.45  | 4.44  | 3.98  | 3.92  |
| A_84_P19825  | PKS4      | AT5G04190 | 1.83  | 1.18  | -1.39 | -2.21 | 2.80  | 2.52  | 1.60  | 1.86  |
| A_84_P173491 | RGF9      | AT5G64770 | 2.72  | 2.60  | 0.52  | 0.91  | 4.09  | 3.89  | 2.93  | 2.93  |
| A_84_P19638  | ROXY2     | AT5G14070 | -3.71 | -2.22 | -4.47 | -3.35 | -1.96 | -1.34 | -1.51 | -1.06 |
| A_84_P519104 | RTFL16    | AT3G25717 | 2.36  | 2.74  | 1.16  | 1.72  | 3.54  | 3.61  | 3.46  | 3.51  |
| A_84_P16734  | SAUR15    | AT4G38850 | 0.12  | 0.43  | -3.79 | -3.52 | 2.18  | 2.21  | 1.33  | 1.48  |
| A_84_P22555  | SAUR68    | AT1G29510 | 2.07  | 2.15  | 0.33  | 0.85  | 3.03  | 3.02  | 2.24  | 2.43  |
| A_84_P15234  | sepB1     | AT1G11080 | 0.21  | 0.43  | -0.39 | -1.67 | 1.04  | 1.24  | -0.70 | -0.22 |
| A_84_P266190 | SOFL1     | AT1G26210 | 1.68  | 1.50  | -0.06 | 0.10  | 2.31  | 2.60  | 1.00  | 0.95  |
| A_84_P753467 | SOFL1     | AT1G26208 | -0.69 | -0.92 | -2.04 | -1.75 | -0.09 | -0.04 | -1.04 | -0.90 |
| A_84_P23812  | ST4C      | AT1G13430 | -3.18 | -2.66 | -3.85 | -3.34 | -1.36 | -1.20 | -1.87 | -1.24 |
| A_84_P790823 | WVD2      | AT5G28646 | -2.81 | -2.75 | -4.26 | -4.31 | -0.47 | -1.31 | -2.04 | -2.68 |
| A_84_P10083  | XTH19     | AT4G30290 | -1.51 | -1.99 | -3.59 | -3.09 | 1.91  | 1.73  | -0.17 | -0.37 |
| A_84_P15301  | ZF14      | AT1G58340 | 2.91  | 3.08  | 1.65  | 1.87  | 3.83  | 3.99  | 3.31  | 3.18  |

**Table S5. List of log<sub>2</sub> expression level of DEX-down-IAA-down genes (>1.5-fold)**

| ProbeName    | GeneName  | AGI code  | EtOH_1 | EtOH_2 | DEX+EtOH_1 | DEX+EtOH_2 | EtOH+IAA_1 | EtOH+IAA_2 | DEX+IAA_1 | DEX+IAA_2 |
|--------------|-----------|-----------|--------|--------|------------|------------|------------|------------|-----------|-----------|
| A_84_P22208  | ABCA4     | AT3G47750 | -0.53  | -0.50  | -1.23      | -1.54      | -1.32      | -1.12      | -1.74     | -1.88     |
| A_84_P14374  | ABCG14    | AT1G31770 | 2.53   | 2.86   | 1.32       | 1.85       | 1.27       | 1.65       | -0.07     | 0.82      |
| A_84_P12588  | ACL       | AT2G23600 | 5.10   | 4.94   | 2.41       | 2.30       | 3.26       | 2.95       | 1.05      | 0.99      |
| A_84_P15145  | ACR3      | AT1G76990 | 5.86   | 5.43   | 4.82       | 4.31       | 5.16       | 4.45       | 4.35      | 3.63      |
| A_84_P808028 | ACR3      | AT1G76990 | -1.80  | -2.13  | -2.75      | -3.39      | -3.20      | -3.41      | -3.68     | -3.50     |
| A_84_P123362 | AFP2      | AT1G13740 | 2.19   | 2.29   | 0.16       | 0.39       | 1.44       | 1.22       | -0.55     | -0.42     |
| A_84_P298854 | AHL20     | AT4G14465 | -0.28  | -0.01  | -2.08      | -1.71      | -2.78      | -1.99      | -3.54     | -2.08     |
| A_84_P753477 | AK220633  | AT1G68568 | -0.80  | -0.91  | -1.77      | -1.84      | -2.03      | -2.22      | -3.06     | -3.55     |
| A_84_P23733  | APT2      | AT1G80050 | 3.48   | 3.80   | 2.10       | 2.43       | 1.46       | 1.93       | 0.70      | 1.00      |
| A_84_P17147  | ARAB-1    | AT1G28670 | 3.72   | 3.89   | 2.74       | 3.09       | 2.62       | 3.17       | 2.34      | 2.70      |
| A_84_P10395  | ARR7      | AT1G19050 | 3.63   | 3.62   | 2.52       | 1.80       | 1.87       | 1.58       | 1.46      | 0.63      |
| A_84_P15163  | AS2       | AT1G65620 | 1.11   | 1.44   | -0.27      | 0.19       | 0.27       | 0.74       | -0.81     | -0.18     |
| A_84_P826615 | AS2       | AT1G65620 | -3.03  | -2.17  | -3.88      | -3.56      | -3.28      | -2.94      | -4.96     | -3.89     |
| A_84_P18932  | AST91     | AT1G23090 | 2.68   | 2.40   | -2.17      | -2.15      | 1.80       | 1.60       | -1.65     | -1.40     |
| A_84_P822023 | AST91     | AT1G23090 | 0.24   | 0.07   | -4.45      | -3.75      | -0.74      | -0.84      | -3.90     | -4.34     |
| A_84_P12740  | AT1G02630 | AT1G02630 | -2.77  | -1.94  | -4.74      | -4.47      | -3.46      | -2.75      | -3.71     | -3.51     |
| A_84_P21249  | AT1G02650 | AT1G02650 | -0.94  | -1.25  | -2.77      | -2.94      | -1.71      | -2.09      | -3.38     | -3.32     |
| A_84_P17060  | AT1G09440 | AT1G09440 | 1.63   | 1.65   | 0.69       | 0.61       | 0.43       | 0.60       | -0.08     | -0.02     |
| A_84_P22769  | AT1G11700 | AT1G11700 | 4.90   | 4.97   | 3.70       | 3.94       | 3.58       | 3.97       | 2.91      | 3.11      |
| A_84_P752662 | AT1G12064 | AT1G12064 | 0.78   | 0.81   | -0.43      | -0.68      | -0.01      | -0.04      | -1.29     | -0.97     |
| A_84_P21881  | AT1G12100 | AT1G12100 | 0.71   | 0.88   | -0.22      | 0.26       | -0.22      | 0.22       | -0.71     | -0.02     |
| A_84_P20792  | AT1G15670 | AT1G15670 | 3.09   | 2.24   | 1.34       | 0.96       | 1.75       | 0.94       | 0.93      | 0.77      |
| A_84_P854414 | AT1G15670 | AT1G15670 | 0.78   | 0.01   | -0.81      | -1.29      | -0.57      | -1.28      | -1.30     | -1.52     |
| A_84_P516067 | AT1G17345 | AT1G17345 | -1.67  | -1.80  | -2.67      | -2.50      | -2.87      | -2.60      | -3.14     | -2.82     |
| A_84_P20019  | AT1G17960 | AT1G17960 | 2.55   | 1.38   | 1.20       | -0.83      | 1.87       | 0.62       | 1.14      | -1.27     |
| A_84_P14276  | AT1G22550 | AT1G22550 | 2.29   | 2.48   | 1.45       | 1.66       | 1.26       | 1.85       | 1.10      | 1.31      |
| A_84_P13332  | AT1G22570 | AT1G22570 | 1.85   | 1.80   | -1.93      | -1.47      | 0.29       | 0.09       | -1.94     | -1.82     |
| A_84_P18707  | AT1G23390 | AT1G23390 | 3.24   | 2.47   | 2.12       | 1.79       | 2.13       | 1.21       | 1.38      | 0.97      |
| A_84_P786694 | AT1G23390 | AT1G23390 | 3.12   | 2.33   | 2.07       | 1.59       | 1.96       | 1.12       | 1.31      | 0.92      |
| A_84_P869207 | AT1G23390 | AT1G23390 | 2.57   | 1.77   | 1.46       | 0.93       | 1.46       | 0.55       | 0.75      | 0.26      |
| A_84_P796487 | AT1G23390 | AT1G23390 | -0.39  | -1.05  | -1.26      | -1.84      | -1.64      | -2.32      | -2.14     | -2.58     |
| A_84_P16262  | AT1G25230 | AT1G25230 | 4.46   | 4.54   | 2.25       | 1.83       | 3.16       | 3.55       | 1.45      | 1.79      |
| A_84_P785932 | AT1G25400 | AT1G25400 | 2.50   | 1.39   | 0.92       | -0.82      | 1.59       | 0.21       | 0.66      | -0.38     |
| A_84_P67084  | AT1G25400 | AT1G25400 | 1.32   | 0.03   | -0.29      | -2.21      | 0.20       | -1.09      | -0.65     | -1.66     |
| A_84_P15298  | AT1G25520 | AT1G25520 | 2.31   | 1.94   | 0.28       | 0.65       | 1.48       | 1.19       | 0.20      | 0.58      |
| A_84_P10039  | AT1G27020 | AT1G27020 | 4.97   | 4.57   | 0.54       | 0.19       | 3.49       | 2.66       | -0.77     | -1.42     |
| A_84_P860087 | AT1G27020 | AT1G27020 | 4.30   | 3.86   | -0.10      | -0.30      | 2.91       | 1.96       | -1.16     | -1.64     |
| A_84_P200014 | AT1G28660 | AT1G28660 | 3.34   | 3.36   | 2.60       | 2.43       | 2.35       | 2.51       | 2.23      | 2.23      |
| A_84_P15451  | AT1G44760 | AT1G44760 | 5.01   | 5.39   | 4.42       | 4.63       | 4.22       | 4.69       | 3.84      | 3.99      |
| A_84_P816367 | AT1G44760 | AT1G44760 | 4.54   | 4.89   | 3.90       | 4.13       | 3.77       | 4.07       | 3.30      | 3.51      |
| A_84_P16258  | AT1G49230 | AT1G49230 | 2.05   | 2.55   | -1.22      | -1.17      | 1.39       | 1.86       | -0.71     | 0.09      |
| A_84_P66364  | AT1G49310 | AT1G49310 | -0.44  | -0.05  | -2.51      | -3.16      | -1.70      | -1.41      | -3.71     | -2.89     |
| A_84_P22625  | AT1G52270 | AT1G52270 | 1.86   | 2.25   | 1.18       | 1.44       | 1.08       | 1.63       | 1.34      | 1.67      |
| A_84_P14112  | AT1G52290 | AT1G52290 | 0.19   | 0.35   | -1.40      | -1.14      | -1.14      | -1.28      | -2.00     | -1.97     |
| A_84_P14201  | AT1G60680 | AT1G60680 | -2.07  | -1.31  | -2.88      | -2.64      | -3.11      | -2.42      | -3.42     | -3.56     |
| A_84_P184384 | AT1G68440 | AT1G68440 | 4.71   | 3.79   | 2.19       | 1.18       | 4.05       | 2.66       | 1.58      | 0.55      |
| A_84_P249125 | AT1G68500 | AT1G68500 | 2.52   | 2.47   | -0.03      | 0.00       | 1.73       | 1.75       | 0.21      | 0.19      |
| A_84_P23779  | AT1G68520 | AT1G68520 | 5.03   | 4.20   | 2.01       | 1.77       | 3.32       | 3.29       | 0.30      | -0.34     |
| A_84_P18751  | AT1G68570 | AT1G68570 | 4.22   | 4.05   | 3.23       | 3.30       | 3.04       | 2.79       | 2.21      | 1.73      |
| A_84_P150878 | AT1G69760 | AT1G69760 | 3.45   | 3.21   | 0.97       | 1.00       | 2.56       | 2.30       | 0.82      | 1.01      |
| A_84_P556074 | AT1G70985 | AT1G70985 | 1.69   | 1.59   | 0.62       | 0.48       | 0.86       | 0.78       | 0.71      | 0.54      |
| A_84_P789698 | AT1G72416 | AT1G72416 | 0.85   | 0.72   | -2.86      | -2.43      | -2.26      | -1.59      | -2.98     | -1.93     |
| A_84_P715317 | AT1G72416 | AT1G72416 | 0.36   | 0.23   | -4.29      | -3.19      | -2.50      | -2.43      | -4.03     | -2.74     |
| A_84_P22853  | AT1G75960 | AT1G75960 | 0.38   | 0.34   | -1.80      | -1.07      | -2.23      | -1.95      | -2.25     | -1.76     |
| A_84_P145909 | AT1G78020 | AT1G78020 | 2.37   | 2.58   | 0.66       | 1.04       | 1.01       | 1.16       | -0.75     | -0.84     |
| A_84_P14286  | AT1G78260 | AT1G78260 | 3.45   | 3.55   | 2.28       | 2.80       | 2.58       | 2.80       | 1.91      | 2.41      |
| A_84_P751743 | AT1G78260 | AT1G78260 | 2.67   | 2.95   | 1.53       | 2.07       | 1.80       | 2.06       | 1.07      | 1.58      |
| A_84_P260410 | AT1G78450 | AT1G78450 | -0.67  | -0.14  | -2.37      | -1.96      | -4.34      | -3.01      | -3.97     | -3.42     |
| A_84_P12443  | AT1G80440 | AT1G80440 | 4.44   | 3.40   | 3.07       | 2.31       | 3.17       | 0.96       | 1.78      | 0.87      |
| A_84_P857022 | AT1G80440 | AT1G80440 | 1.33   | 0.28   | -0.06      | -0.77      | -0.12      | -2.31      | -1.38     | -2.39     |
| A_84_P268090 | AT2G01300 | AT2G01300 | -0.34  | -0.41  | -1.22      | -1.84      | -2.13      | -2.91      | -2.09     | -2.49     |
| A_84_P505592 | AT2G04795 | AT2G04795 | 1.27   | 0.55   | -1.72      | -2.53      | 0.14       | -0.76      | -2.12     | -2.35     |
| A_84_P116392 | AT2G15910 | AT2G15910 | -3.40  | -3.56  | -3.89      | -3.63      | -3.43      | -3.67      | -3.86     | -4.24     |
| A_84_P843500 | AT2G15910 | AT2G15910 | -3.62  | -3.89  | -4.40      | -4.56      | -4.28      | -4.64      | -4.16     | -3.24     |
| A_84_P235483 | AT2G18360 | AT2G18360 | 0.46   | 0.34   | -2.07      | -2.24      | -0.98      | -0.82      | -2.21     | -1.83     |
| A_84_P132645 | AT2G20670 | AT2G20670 | 5.90   | 4.91   | 4.52       | 3.93       | 3.49       | 2.82       | 2.82      | 2.22      |
| A_84_P513598 | AT2G22122 | AT2G22122 | 1.14   | 1.25   | -0.20      | -0.16      | 0.32       | 0.60       | 0.41      | 0.38      |
| A_84_P21994  | AT2G26440 | AT2G26440 | 2.92   | 2.97   | 0.28       | 0.06       | 2.31       | 2.35       | 0.54      | 0.42      |
| A_84_P12501  | AT2G28200 | AT2G28200 | 0.70   | 0.20   | -0.42      | -0.79      | -0.45      | -0.50      | -0.91     | -1.13     |
| A_84_P12493  | AT2G30540 | AT2G30540 | -1.06  | -0.46  | -2.20      | -2.10      | -2.19      | -2.08      | -3.13     | -2.14     |
| A_84_P304680 | AT2G30600 | AT2G30600 | 5.00   | 4.97   | 3.10       | 3.12       | 3.87       | 3.44       | 2.79      | 3.03      |
| A_84_P189284 | AT2G30930 | AT2G30930 | 2.92   | 2.83   | 2.28       | 1.61       | 2.00       | 1.59       | 1.67      | 1.08      |

|              |           |           |       |       |       |       |       |       |       |       |
|--------------|-----------|-----------|-------|-------|-------|-------|-------|-------|-------|-------|
| A_84_P23890  | AT2G32960 | AT2G32960 | 2.55  | 2.22  | 0.26  | -0.08 | 1.56  | 1.29  | -0.76 | -0.83 |
| A_84_P565934 | AT2G34010 | AT2G34010 | -1.30 | -1.29 | -2.69 | -2.43 | -3.41 | -3.17 | -3.51 | -3.20 |
| A_84_P11644  | AT2G37460 | AT2G37460 | 0.47  | 0.62  | -2.41 | -2.66 | -1.46 | -1.24 | -3.77 | -2.75 |
| A_84_P150068 | AT2G43140 | AT2G43140 | 2.07  | 1.16  | -1.53 | -1.80 | -1.51 | -3.19 | -2.53 | -1.79 |
| A_84_P838362 | AT2G43140 | AT2G43140 | 0.67  | -0.13 | -2.43 | -2.38 | -2.27 | -4.08 | -3.27 | -2.38 |
| A_84_P809606 | AT2G45180 | AT2G45180 | 9.21  | 9.01  | 7.09  | 7.05  | 7.88  | 7.94  | 6.33  | 6.37  |
| A_84_P272390 | AT2G45180 | AT2G45180 | 8.64  | 8.43  | 6.49  | 6.47  | 7.25  | 7.33  | 5.73  | 5.79  |
| A_84_P809597 | AT2G45180 | AT2G45180 | 8.40  | 8.14  | 6.16  | 6.10  | 6.96  | 7.13  | 5.41  | 5.52  |
| A_84_P801096 | AT2G45180 | AT2G45180 | 8.32  | 8.11  | 6.13  | 6.07  | 6.93  | 7.01  | 5.35  | 5.45  |
| A_84_P597183 | AT2G45900 | AT2G45900 | 1.40  | 1.27  | 0.45  | 0.64  | 0.01  | 0.41  | -0.54 | -0.65 |
| A_84_P144789 | AT3G01860 | AT3G01860 | 3.38  | 3.30  | 1.84  | 2.10  | 2.39  | 2.49  | 1.86  | 1.86  |
| A_84_P829153 | AT3G01860 | AT3G01860 | 2.62  | 2.56  | 1.06  | 1.35  | 1.61  | 1.76  | 1.09  | 1.09  |
| A_84_P520804 | AT3G06020 | AT3G06020 | -0.95 | -1.02 | -1.70 | -1.97 | -2.90 | -2.25 | -2.72 | -2.83 |
| A_84_P108832 | AT3G06070 | AT3G06070 | 1.02  | 1.00  | -1.11 | -1.26 | 0.20  | 0.15  | -0.99 | -1.21 |
| A_84_P242653 | AT3G06990 | AT3G06990 | -2.36 | -1.97 | -3.02 | -3.28 | -3.41 | -3.22 | -3.80 | -3.16 |
| A_84_P21242  | AT3G11280 | AT3G11280 | 3.56  | 3.13  | 2.48  | 2.04  | 2.37  | 2.10  | 1.60  | 1.12  |
| A_84_P810292 | AT3G11930 | AT3G11930 | 3.75  | 3.15  | 3.24  | 2.86  | 2.93  | 2.92  | 2.44  | 2.16  |
| A_84_P22107  | AT3G11930 | AT3G11930 | 2.64  | 2.07  | 2.22  | 1.86  | 1.89  | 1.92  | 1.33  | 1.18  |
| A_84_P861062 | AT3G11930 | AT3G11930 | 1.99  | 1.58  | 1.63  | 1.38  | 1.41  | 1.24  | 0.79  | 0.54  |
| A_84_P857510 | AT3G11930 | AT3G11930 | -0.53 | -1.64 | -1.90 | -2.38 | -1.80 | -2.33 | -4.54 | -4.30 |
| A_84_P16506  | AT3G14770 | AT3G14770 | 2.00  | 1.33  | 0.84  | 0.59  | 1.07  | 0.61  | 0.14  | -0.15 |
| A_84_P823098 | AT3G14770 | AT3G14770 | -0.17 | -0.55 | -1.14 | -1.54 | -0.87 | -1.32 | -1.71 | -1.94 |
| A_84_P17452  | AT3G14780 | AT3G14780 | -0.71 | -0.63 | -1.47 | -1.72 | -1.66 | -1.47 | -1.79 | -2.22 |
| A_84_P296824 | AT3G15450 | AT3G15450 | 8.08  | 7.93  | 6.88  | 6.97  | 6.82  | 6.19  | 6.17  | 6.36  |
| A_84_P855440 | AT3G15450 | AT3G15450 | 5.89  | 5.58  | 4.90  | 4.94  | 4.75  | 3.91  | 4.06  | 4.30  |
| A_84_P805118 | AT3G15450 | AT3G15450 | 6.08  | 5.68  | 4.83  | 4.87  | 4.76  | 4.08  | 3.97  | 4.27  |
| A_84_P805135 | AT3G15450 | AT3G15450 | 5.41  | 4.94  | 4.14  | 4.10  | 4.03  | 3.25  | 3.33  | 3.57  |
| A_84_P818968 | AT3G15630 | AT3G15630 | 2.33  | 2.64  | 1.29  | 1.78  | 1.24  | 1.77  | 0.88  | 1.74  |
| A_84_P81409  | AT3G15630 | AT3G15630 | 2.49  | 2.50  | 1.17  | 1.51  | 0.35  | 0.76  | 0.15  | 0.90  |
| A_84_P582090 | AT3G18773 | AT3G18773 | -0.12 | -0.89 | -2.90 | -3.37 | -1.30 | -1.97 | -3.91 | -3.42 |
| A_84_P831705 | AT3G18900 | AT3G18900 | 0.07  | 0.44  | -1.15 | -0.93 | -1.58 | -1.16 | -3.19 | -2.00 |
| A_84_P587454 | AT3G19850 | AT3G19850 | 2.28  | 1.76  | -0.42 | -0.98 | -0.38 | 0.07  | -1.51 | -1.72 |
| A_84_P591022 | AT3G21530 | AT3G21530 | -0.35 | -0.83 | -1.50 | -1.90 | -1.33 | -1.73 | -2.06 | -2.67 |
| A_84_P13632  | AT3G26700 | AT3G26700 | 1.53  | 1.81  | 0.59  | 1.14  | 0.69  | 0.83  | 0.70  | 0.87  |
| A_84_P826141 | AT3G27030 | AT3G27030 | 1.97  | 1.96  | -0.19 | -0.50 | 0.92  | 1.19  | -0.86 | -0.74 |
| A_84_P534191 | AT3G27030 | AT3G27030 | 0.99  | 0.94  | -1.26 | -1.35 | -0.04 | 0.12  | -1.98 | -1.98 |
| A_84_P21738  | AT3G28345 | AT3G28345 | 1.57  | 1.96  | 0.25  | 0.34  | 0.55  | 0.76  | -0.51 | -0.04 |
| A_84_P832213 | AT3G28345 | AT3G28345 | 0.45  | 0.86  | -0.90 | -0.66 | -0.61 | -0.49 | -1.37 | -0.94 |
| A_84_P22154  | AT3G29680 | AT3G29680 | -0.81 | -0.59 | -1.45 | -1.35 | -1.87 | -1.45 | -2.22 | -1.92 |
| A_84_P759203 | AT3G30730 | AT3G30730 | -0.59 | -0.58 | -1.41 | -1.29 | -1.74 | -1.21 | -2.16 | -1.69 |
| A_84_P286710 | AT3G45160 | AT3G45160 | 3.41  | 3.61  | 2.20  | 2.25  | 2.73  | 2.85  | 1.85  | 2.08  |
| A_84_P526212 | AT3G46880 | AT3G46880 | -1.32 | -0.67 | -2.62 | -2.03 | -3.11 | -2.68 | -3.85 | -3.70 |
| A_84_P24099  | AT3G47570 | AT3G47570 | 1.91  | 1.88  | 0.29  | 0.15  | 1.07  | 0.96  | 0.26  | 0.35  |
| A_84_P274520 | AT3G47980 | AT3G47980 | 0.51  | 0.56  | -0.55 | -0.49 | -0.51 | -0.39 | -1.10 | -1.12 |
| A_84_P22211  | AT3G48720 | AT3G48720 | 2.61  | 2.77  | 0.54  | 0.37  | 1.69  | 1.71  | 0.23  | -0.52 |
| A_84_P24103  | AT3G48740 | AT3G48740 | 2.96  | 1.93  | 0.59  | -0.12 | 2.13  | 1.12  | -0.53 | -1.40 |
| A_84_P813422 | AT3G48740 | AT3G48740 | 0.75  | -0.15 | -1.22 | -2.08 | 0.03  | -1.01 | -2.45 | -2.86 |
| A_84_P593798 | AT3G61660 | AT3G61660 | -1.94 | -2.12 | -4.01 | -3.79 | -2.75 | -3.18 | -4.31 | -3.35 |
| A_84_P11867  | AT3G62040 | AT3G62040 | -1.08 | -0.40 | -3.49 | -3.90 | -2.18 | -2.24 | -3.88 | -4.19 |
| A_84_P23218  | AT3G62930 | AT3G62930 | 1.26  | 1.45  | -0.57 | -0.76 | -1.05 | -0.73 | -2.10 | -1.80 |
| A_84_P16607  | AT4G01450 | AT4G01450 | 1.92  | 2.16  | 1.14  | 1.18  | 0.30  | 0.72  | -0.93 | 0.04  |
| A_84_P831869 | AT4G02810 | AT4G02810 | -1.13 | -1.70 | -2.39 | -4.75 | -1.72 | -2.45 | -3.87 | -4.18 |
| A_84_P16626  | AT4G08770 | AT4G08770 | 1.49  | 0.71  | -2.95 | -2.88 | -0.19 | -1.36 | -4.14 | -4.85 |
| A_84_P178304 | AT4G15690 | AT4G15690 | 0.70  | 0.13  | -1.50 | -3.05 | -0.49 | -0.71 | -2.74 | -2.70 |
| A_84_P11926  | AT4G19380 | AT4G19380 | 3.56  | 3.53  | 2.08  | 2.49  | 1.72  | 1.72  | 1.59  | 1.92  |
| A_84_P13818  | AT4G19820 | AT4G19820 | 0.36  | 0.12  | -2.97 | -3.44 | -1.65 | -1.54 | -4.10 | -4.81 |
| A_84_P17609  | AT4G21870 | AT4G21870 | 5.77  | 5.36  | 1.85  | 1.85  | 3.09  | 2.58  | 1.14  | 1.60  |
| A_84_P538776 | AT4G24015 | AT4G24015 | 0.28  | 0.61  | -0.72 | -0.61 | -0.67 | -0.57 | -1.00 | -0.72 |
| A_84_P18579  | AT4G27300 | AT4G27300 | 2.38  | 2.44  | 0.42  | 0.32  | 1.74  | 0.90  | -0.51 | -1.08 |
| A_84_P151248 | AT4G27570 | AT4G27570 | -1.76 | -1.25 | -3.30 | -4.38 | -2.69 | -2.17 | -3.82 | -4.11 |
| A_84_P824302 | AT4G29310 | AT4G29310 | 4.25  | 4.14  | 2.54  | 2.48  | 2.88  | 2.97  | 1.99  | 1.86  |
| A_84_P243195 | AT4G29310 | AT4G29310 | 3.66  | 3.51  | 1.96  | 1.82  | 2.27  | 2.28  | 1.34  | 1.25  |
| A_84_P119612 | AT4G31620 | AT4G31620 | -1.76 | -1.20 | -2.65 | -2.08 | -3.35 | -2.60 | -4.32 | -2.58 |
| A_84_P577849 | AT4G33770 | AT4G33770 | 2.44  | 2.54  | 1.02  | 0.63  | 1.71  | 1.66  | 0.79  | 0.51  |
| A_84_P830890 | AT4G33770 | AT4G33770 | 2.07  | 2.16  | 0.47  | 0.18  | 1.42  | 1.26  | 0.40  | 0.17  |
| A_84_P23341  | AT4G34790 | AT4G34790 | 1.72  | 1.71  | 0.64  | 0.39  | -0.06 | 0.19  | 0.16  | 0.67  |
| A_84_P11048  | AT4G34810 | AT4G34810 | 3.21  | 2.82  | 0.15  | -0.16 | -0.01 | -0.45 | -0.56 | -0.30 |
| A_84_P850593 | AT4G36040 | AT4G36040 | 5.24  | 3.99  | 3.88  | 3.32  | 3.84  | 2.56  | 3.36  | 3.04  |
| A_84_P11054  | AT4G36040 | AT4G36040 | 4.89  | 3.59  | 3.39  | 2.82  | 3.42  | 2.14  | 2.88  | 2.61  |
| A_84_P192434 | AT4G36850 | AT4G36850 | 5.89  | 4.15  | 2.02  | 0.68  | 5.10  | 3.54  | 1.60  | 0.20  |
| A_84_P765839 | AT4G38825 | AT4G38825 | 1.87  | 2.05  | -2.33 | -2.05 | 1.22  | 1.35  | 0.25  | 0.55  |
| A_84_P16735  | AT4G39070 | AT4G39070 | 1.73  | 2.01  | 0.72  | 0.91  | 0.26  | 0.24  | -0.59 | -0.53 |
| A_84_P572544 | AT5G03310 | AT5G03310 | -2.14 | -2.45 | -3.08 | -3.52 | -3.33 | -3.38 | -3.56 | -3.29 |
| A_84_P831588 | AT5G03360 | AT5G03360 | -0.06 | -0.12 | -1.37 | -1.73 | -0.93 | -1.11 | -1.04 | -1.11 |

|               |           |           |       |       |       |       |       |       |       |       |
|---------------|-----------|-----------|-------|-------|-------|-------|-------|-------|-------|-------|
| A_84_P732491  | AT5G03995 | AT5G03995 | 1.28  | 1.38  | -0.16 | -0.28 | -2.07 | -1.51 | -3.17 | -2.30 |
| A_84_P237873  | AT5G04310 | AT5G04310 | -0.16 | -0.53 | -1.80 | -1.80 | -0.79 | -1.48 | -2.06 | -2.48 |
| A_84_P22447   | AT5G05420 | AT5G05420 | -0.67 | -1.31 | -2.42 | -2.44 | -1.58 | -2.04 | -2.02 | -2.54 |
| A_84_P12991   | AT5G05790 | AT5G05790 | 0.54  | 0.39  | -0.41 | -0.39 | -0.74 | -0.81 | -1.11 | -1.56 |
| A_84_P12054   | AT5G07580 | AT5G07580 | 4.51  | 4.57  | 1.09  | 1.54  | 2.34  | 2.85  | 0.15  | 0.65  |
| A_84_P821249  | AT5G07580 | AT5G07580 | 2.59  | 2.69  | -0.71 | -0.24 | 0.44  | 0.97  | -1.72 | -1.03 |
| A_84_P23593   | AT5G08350 | AT5G08350 | 1.74  | 1.73  | -0.79 | -0.90 | 0.32  | 0.34  | -1.21 | -1.13 |
| A_84_P311633  | AT5G11070 | AT5G11070 | 5.62  | 5.31  | 4.49  | 4.47  | 3.89  | 4.34  | 3.76  | 4.39  |
| A_84_P597535  | AT5G14090 | AT5G14090 | 1.35  | 1.54  | 0.00  | -0.08 | -0.60 | -0.31 | -1.19 | -0.85 |
| A_84_P522030  | AT5G14110 | AT5G14110 | -2.30 | -1.93 | -3.61 | -3.22 | -3.28 | -3.08 | -3.79 | -3.73 |
| A_84_P21530   | AT5G14120 | AT5G14120 | 5.13  | 4.73  | 1.78  | 1.75  | 3.56  | 3.02  | 1.34  | 1.35  |
| A_84_P605545  | AT5G14330 | AT5G14330 | 0.59  | 1.61  | -0.14 | 0.66  | -0.46 | 0.82  | -0.27 | 0.59  |
| A_84_P23423   | AT5G14360 | AT5G14360 | -0.16 | -0.46 | -1.27 | -1.44 | -1.50 | -1.38 | -1.11 | -1.31 |
| A_84_P309733  | AT5G16350 | AT5G16350 | 0.05  | 0.06  | -0.77 | -0.95 | -0.86 | -0.91 | -1.09 | -1.30 |
| A_84_P11140   | AT5G18840 | AT5G18840 | -0.18 | 0.50  | -1.43 | -0.29 | -2.70 | -2.13 | -2.96 | -2.28 |
| A_84_P131376  | AT5G19190 | AT5G19190 | 3.66  | 3.01  | 2.45  | 2.18  | 1.56  | 1.33  | 1.53  | 1.62  |
| A_84_P541541  | AT5G20640 | AT5G20640 | -2.70 | -1.89 | -3.32 | -3.29 | -3.88 | -3.87 | -4.09 | -3.91 |
| A_84_P795530  | AT5G22390 | AT5G22390 | 1.07  | 0.77  | 0.31  | -0.19 | -0.21 | -0.56 | -0.94 | -0.94 |
| A_84_P221276  | AT5G22390 | AT5G22390 | -1.63 | -1.84 | -2.06 | -2.28 | -3.42 | -3.04 | -3.14 | -3.14 |
| A_84_P597565  | AT5G22870 | AT5G22870 | -2.01 | -2.13 | -2.79 | -2.87 | -3.10 | -2.91 | -3.37 | -3.11 |
| A_84_P10198   | AT5G22920 | AT5G22920 | 5.73  | 5.81  | 3.89  | 4.10  | 3.78  | 3.90  | 3.45  | 3.65  |
| A_84_P814618  | AT5G22920 | AT5G22920 | 3.37  | 3.43  | 1.69  | 1.83  | 1.48  | 1.59  | 1.19  | 1.37  |
| A_84_P10200   | AT5G23360 | AT5G23360 | -1.23 | -0.90 | -2.31 | -2.54 | -2.52 | -2.18 | -3.12 | -2.48 |
| A_84_P11146   | AT5G23370 | AT5G23370 | -2.89 | -2.79 | -4.35 | -3.46 | -3.94 | -3.74 | -3.62 | -4.21 |
| A_84_P226859  | AT5G24570 | AT5G24570 | 3.44  | 3.04  | 2.59  | 2.04  | 2.66  | 2.01  | 2.17  | 1.79  |
| A_84_P795781  | AT5G24570 | AK220744  | -0.85 | -1.13 | -1.73 | -2.16 | -1.23 | -1.75 | -1.67 | -2.04 |
| A_84_P18859   | AT5G28630 | AT5G28630 | 1.09  | 0.95  | -0.06 | -0.20 | 0.22  | -0.48 | -0.22 | -0.67 |
| A_84_P502546  | AT5G35525 | AT5G35525 | -1.36 | -1.40 | -3.91 | -3.37 | -2.57 | -2.32 | -3.57 | -3.05 |
| A_84_P13065   | AT5G39080 | AT5G39080 | 3.81  | 3.35  | 2.49  | 2.25  | 2.36  | 2.22  | 1.74  | 1.36  |
| A_84_P20636   | AT5G40450 | AT5G40450 | 3.06  | 2.62  | 0.13  | -0.39 | 2.27  | 1.85  | -0.14 | -0.54 |
| A_84_P769282  | AT5G40450 | AT5G40451 | 2.03  | 1.47  | -1.06 | -1.70 | 1.22  | 0.63  | -1.16 | -1.74 |
| A_84_P56650   | AT5G41080 | AT5G41080 | 2.50  | 2.79  | 1.76  | 1.76  | 0.82  | 0.60  | 0.89  | 1.15  |
| A_84_P790164  | AT5G41080 | AT5G41080 | 2.03  | 2.39  | 1.41  | 1.43  | 0.36  | 0.33  | 0.54  | 0.75  |
| A_84_P594929  | AT5G43120 | AT5G43120 | -2.39 | -2.14 | -3.46 | -2.89 | -3.60 | -3.57 | -4.99 | -3.45 |
| A_84_P854040  | AT5G44020 | AT5G44020 | 6.45  | 6.58  | 5.92  | 5.98  | 5.57  | 5.74  | 5.81  | 5.80  |
| A_84_P13082   | AT5G44020 | AT5G44020 | 5.14  | 5.26  | 4.15  | 4.28  | 3.74  | 3.98  | 3.44  | 3.75  |
| A_84_P854498  | AT5G44020 | AT5G44020 | 4.59  | 4.63  | 3.52  | 3.70  | 3.15  | 3.39  | 2.86  | 3.21  |
| A_84_P548712  | AT5G49800 | AT5G49800 | -1.44 | -1.17 | -2.33 | -2.08 | -2.07 | -1.78 | -2.94 | -2.57 |
| A_84_P558452  | AT5G51850 | AT5G51850 | -0.93 | -0.86 | -2.28 | -2.04 | -2.24 | -1.74 | -2.28 | -2.65 |
| A_84_P5121243 | AT5G53230 | AT5G53230 | 1.08  | 0.26  | -0.18 | -1.92 | 0.46  | -0.54 | -0.21 | -2.64 |
| A_84_P159285  | AT5G53240 | AT5G53240 | -1.38 | -2.28 | -2.83 | -4.54 | -2.32 | -3.51 | -2.87 | -4.34 |
| A_84_P15958   | AT5G54940 | AT5G54940 | 7.00  | 6.65  | 6.28  | 6.05  | 6.33  | 5.85  | 6.06  | 5.79  |
| A_84_P785967  | AT5G54940 | AT5G54940 | 5.65  | 5.35  | 5.01  | 4.79  | 4.99  | 4.46  | 4.75  | 4.47  |
| A_84_P809682  | AT5G54940 | AT5G54940 | 1.21  | 0.92  | 0.58  | 0.40  | 0.58  | -0.01 | 0.46  | 0.12  |
| A_84_P11239   | AT5G56840 | AT5G56840 | 2.46  | 2.36  | 0.08  | 0.08  | 1.56  | 0.79  | -1.37 | -1.65 |
| A_84_P19829   | AT5G58390 | AT5G58390 | 3.73  | 3.75  | 1.93  | 1.89  | 3.14  | 3.05  | 2.30  | 2.11  |
| A_84_P830800  | AT5G58390 | AT5G58390 | 1.45  | 1.43  | -0.39 | -0.46 | 0.90  | 0.74  | -0.07 | -0.30 |
| A_84_P12190   | AT5G58660 | AT5G58660 | 0.68  | 0.48  | -0.71 | -0.93 | -0.69 | -0.43 | -0.10 | -0.30 |
| A_84_P834496  | AT5G58660 | AT5G58660 | -1.13 | -1.42 | -2.59 | -2.77 | -2.37 | -2.41 | -2.59 | -2.17 |
| A_84_P21648   | AT5G58900 | AT5G58900 | 4.00  | 4.11  | 1.75  | 1.93  | 2.85  | 3.29  | 1.44  | 1.47  |
| A_84_P856315  | AT5G60400 | AT5G60400 | 3.76  | 3.99  | 2.47  | 3.08  | 2.72  | 3.22  | 2.31  | 2.94  |
| A_84_P825265  | AT5G60400 | AT5G60400 | 3.78  | 3.92  | 2.38  | 3.01  | 2.67  | 3.13  | 2.26  | 2.89  |
| A_84_P162513  | AT5G60400 | AT5G60400 | 2.15  | 2.21  | 0.59  | 1.21  | 0.97  | 1.31  | 0.34  | 1.02  |
| A_84_P21661   | AT5G61590 | AT5G61590 | 5.82  | 5.44  | 0.94  | 1.68  | 3.36  | 3.42  | -0.68 | 0.43  |
| A_84_P17881   | AT5G62360 | AT5G62360 | 2.91  | 3.32  | 1.33  | 1.58  | 0.07  | 1.80  | 0.24  | 1.41  |
| A_84_P847119  | AT5G62360 | AT5G62360 | 2.75  | 3.07  | 1.17  | 1.35  | -0.17 | 1.59  | 0.27  | 1.29  |
| A_84_P816405  | AT5G62360 | AT5G62360 | 0.29  | 0.66  | -1.09 | -0.93 | -2.69 | -0.92 | -2.26 | -1.01 |
| A_84_P802615  | AT5G62360 | AT5G62360 | -1.32 | -0.70 | -3.02 | -2.48 | -4.21 | -2.36 | -5.00 | -2.91 |
| A_84_P297784  | AT5G64850 | AT5G64850 | 4.55  | 4.07  | 2.64  | 2.13  | 3.39  | 2.48  | 1.90  | 1.60  |
| A_84_P243525  | AT5G65040 | AT5G65040 | 2.18  | 2.03  | -0.93 | -1.19 | -0.49 | -0.76 | -3.37 | -3.11 |
| A_84_P571830  | AT5G65925 | AT5G65925 | 1.00  | 1.31  | 0.15  | 0.57  | 0.32  | 0.58  | -0.28 | 0.39  |
| A_84_P20700   | ATL63     | AT5G58580 | 2.81  | 2.53  | 1.68  | 1.46  | 2.05  | 1.94  | 1.13  | 0.98  |
| A_84_P851410  | BE039144  |           | 5.97  | 5.65  | 4.81  | 4.95  | 4.69  | 3.97  | 4.02  | 4.34  |
| A_84_P16748   | BES1      | AT1G19350 | 6.71  | 6.76  | 6.39  | 6.35  | 6.35  | 6.49  | 6.52  | 6.56  |
| A_84_P815715  | BES1      | AT1G19350 | 3.68  | 3.78  | 3.65  | 3.62  | 3.38  | 3.60  | 3.67  | 3.71  |
| A_84_P815721  | BES1      | AT1G19350 | 1.28  | 1.53  | 0.58  | 0.59  | -0.06 | 0.26  | -0.10 | 0.18  |
| A_84_P20337   | BGAL2     | AT3G52840 | 3.30  | 3.53  | 2.44  | 2.29  | 2.02  | 2.35  | 1.23  | 1.59  |
| A_84_P12184   | BGAL4     | AT5G56870 | -0.15 | -0.66 | -0.86 | -1.88 | -2.03 | -1.52 | -0.56 | -1.32 |
| A_84_P851517  | BGAL4     | AT5G56870 | -2.61 | -2.93 | -2.83 | -3.27 | -3.16 | -3.71 | -2.71 | -3.25 |
| A_84_P14235   | BGLU46    | AT1G61820 | -0.81 | -0.44 | -1.66 | -1.81 | -2.19 | -2.04 | -2.43 | -2.27 |
| A_84_P17757   | BMY3      | AT5G18670 | 5.83  | 5.41  | 4.28  | 4.09  | 5.21  | 4.81  | 4.32  | 4.17  |
| A_84_P853428  | BP803304  |           | -2.05 | -1.38 | -3.05 | -2.69 | -3.54 | -3.35 | -3.88 | -3.20 |
| A_84_P228049  | BT1       | AT5G63160 | 4.14  | 2.44  | 2.38  | 1.32  | 2.54  | 1.57  | 1.16  | 0.75  |
| A_84_P21458   | BT5       | AT4G37610 | 4.87  | 4.75  | 3.60  | 3.27  | 3.02  | 2.75  | 2.92  | 2.82  |

|              |          |           |       |       |       |       |       |       |       |       |
|--------------|----------|-----------|-------|-------|-------|-------|-------|-------|-------|-------|
| A_84_P16885  | BXL1     | AT5G49360 | 3.98  | 4.28  | 2.62  | 2.61  | 2.08  | 2.43  | 1.29  | 2.25  |
| A_84_P16520  | BXL2     | AT1G02640 | 4.63  | 4.59  | 2.78  | 2.60  | 3.34  | 3.67  | 2.95  | 3.37  |
| A_84_P17164  | bZIP     | AT1G68880 | -1.72 | -2.31 | -3.36 | -3.41 | -2.66 | -4.17 | -4.21 | -4.24 |
| A_84_P15068  | bZIP3    | AT5G15830 | -0.49 | -0.48 | -4.45 | -4.48 | -2.01 | -2.13 | -4.39 | -4.38 |
| A_84_P17923  | BZO2H3   | AT5G28770 | 4.02  | 3.63  | 2.12  | 2.23  | 2.66  | 2.49  | 1.73  | 2.26  |
| A_84_P822924 | BZO2H3   | AT5G28770 | 2.07  | 1.60  | 0.14  | 0.17  | 0.74  | 0.56  | -0.29 | 0.29  |
| A_84_P11955  | CGA1     | AT4G26150 | 1.44  | 1.74  | -0.26 | 0.19  | 0.06  | -0.04 | -1.90 | -1.14 |
| A_84_P22189  | CHR38    | AT3G42670 | 1.30  | 1.85  | 0.30  | 0.71  | 0.45  | 1.19  | -0.14 | 0.60  |
| A_84_P503591 | CIL      | AT4G25990 | 4.12  | 4.16  | 1.96  | 2.31  | 2.91  | 2.81  | 1.28  | 1.78  |
| A_84_P611792 | CKX7     | AT5G21482 | 0.72  | 0.75  | -0.38 | -0.05 | -0.86 | -0.97 | -1.04 | -1.29 |
| A_84_P265780 | CO       | AT5G15840 | 1.56  | 1.19  | -1.05 | -1.22 | 0.02  | -0.47 | -1.92 | -1.41 |
| A_84_P784276 | CO       | AT5G15840 | 0.61  | 0.26  | -2.02 | -1.88 | -0.92 | -1.30 | -2.45 | -1.92 |
| A_84_P584673 | CPL3     | AT2G33540 | 1.75  | 1.73  | 1.90  | 2.22  | 1.71  | 2.08  | 1.88  | 2.20  |
| A_84_P764077 | CPL3     | AT4G01060 | 3.02  | 2.75  | 1.18  | 1.99  | 0.80  | 1.58  | 0.38  | 0.86  |
| A_84_P787734 | CPL3     | AT4G01060 | 1.98  | 1.75  | 0.21  | 0.99  | -0.18 | 0.45  | -0.54 | -0.01 |
| A_84_P532498 | CPL3     | AT4G01060 | 2.04  | 1.82  | 0.26  | 1.05  | 0.00  | 0.57  | -0.59 | -0.01 |
| A_84_P14954  | CPuORF32 | AT1G73600 | 5.22  | 5.71  | 4.18  | 4.90  | 2.76  | 3.68  | 2.60  | 3.30  |
| A_84_P10999  | CRF2     | AT4G23750 | 4.17  | 4.27  | 3.26  | 3.48  | 2.83  | 3.12  | 3.01  | 3.49  |
| A_84_P793897 | CRF2     | AT4G23750 | -3.10 | -2.41 | -3.30 | -3.40 | -2.84 | -3.27 | -2.67 | -3.13 |
| A_84_P16898  | CRF3     | AT5G53290 | 0.92  | 1.24  | -0.34 | -0.33 | 0.26  | 0.31  | -0.75 | -0.37 |
| A_84_P15691  | CRK30    | AT4G11460 | 2.15  | 2.14  | -1.79 | -1.56 | -0.91 | -0.29 | -3.23 | -2.63 |
| A_84_P575245 | CSLA11   | AT5G16190 | 1.23  | 1.40  | -1.60 | -0.25 | 0.56  | -0.30 | -2.00 | -1.90 |
| A_84_P856597 | CSLA11   | AT5G16190 | 1.38  | 1.51  | -1.34 | -0.17 | -0.24 | 0.69  | -1.81 | -1.46 |
| A_84_P16015  | CXE17    | AT5G16080 | 0.18  | -0.46 | -1.08 | -1.20 | -1.29 | -1.68 | -1.31 | -1.49 |
| A_84_P13313  | CYP71B7  | AT1G13110 | 3.18  | 3.37  | 1.79  | 1.96  | 1.48  | 1.34  | 0.87  | 0.83  |
| A_84_P19565  | CYP91A2  | AT4G37430 | 2.45  | 2.47  | 1.55  | 1.73  | 1.67  | 1.90  | 1.15  | 1.36  |
| A_84_P857969 | CYP91A2  | AT4G37430 | -0.62 | -0.51 | -1.35 | -1.12 | -1.22 | -1.11 | -2.02 | -1.78 |
| A_84_P14131  | DIN10    | AT5G20250 | 7.25  | 6.93  | 3.31  | 3.20  | 5.40  | 4.79  | 2.44  | 2.83  |
| A_84_P811412 | DIN10    | AT5G20250 | 0.49  | 0.35  | -3.45 | -3.28 | -1.26 | -1.80 | -4.13 | -3.83 |
| A_84_P856007 | DIN10    | AT5G20250 | -0.43 | -0.38 | -3.57 | -3.46 | -1.72 | -2.30 | -4.56 | -4.17 |
| A_84_P811421 | DIN10    | AT5G20250 | -1.45 | -1.42 | -3.20 | -3.74 | -2.87 | -3.19 | -4.12 | -3.66 |
| A_84_P853466 | DIN10    | AT5G20250 | -1.00 | -1.18 | -4.40 | -4.21 | -2.27 | -2.94 | -4.64 | -4.68 |
| A_84_P795830 | DQ108818 |           | -0.49 | -1.28 | -2.59 | -3.92 | -1.13 | -2.40 | -2.47 | -3.05 |
| A_84_P797706 | EG463912 |           | -2.49 | -1.66 | -3.20 | -2.76 | -4.47 | -4.19 | -4.74 | -4.85 |
| A_84_P789279 | EG527418 |           | -1.72 | -1.56 | -2.39 | -2.80 | -2.85 | -2.64 | -4.61 | -4.05 |
| A_84_P22153  | ERD5     | AT3G30775 | 5.50  | 5.59  | 1.81  | 1.69  | 3.70  | 2.76  | 0.76  | 0.12  |
| A_84_P803506 | ERD5     | AT3G30775 | 2.90  | 3.12  | -0.62 | -0.65 | 1.17  | 0.25  | -1.82 | -2.34 |
| A_84_P812380 | ERD5     | AT3G30775 | 2.30  | 2.46  | -1.26 | -1.30 | 0.63  | -0.43 | -2.38 | -2.89 |
| A_84_P803062 | ERD5     | AT3G30775 | 1.99  | 2.10  | -1.51 | -1.56 | 0.28  | -0.80 | -2.34 | -3.22 |
| A_84_P20950  | GER1     | AT1G72610 | 7.84  | 8.07  | 5.81  | 6.16  | 6.92  | 7.03  | 5.02  | 4.90  |
| A_84_P802561 | GER1     | AT1G72610 | 6.63  | 6.93  | 4.61  | 4.99  | 5.75  | 5.88  | 3.88  | 3.75  |
| A_84_P802215 | GER1     | AT1G72610 | -2.98 | -2.74 | -3.46 | -3.20 | -2.66 | -2.63 | -3.99 | -3.68 |
| A_84_P19142  | GH3.9    | AT2G47750 | -0.83 | -0.95 | -1.27 | -1.75 | -1.77 | -1.45 | -1.52 | -2.16 |
| A_84_P826972 | GH3.9    | AT2G47750 | -3.14 | -3.23 | -4.07 | -4.87 | -4.24 | -3.99 | -4.38 | -4.35 |
| A_84_P105796 | GRF6     | AT2G06200 | -0.11 | 0.19  | -3.48 | -4.24 | -1.29 | -0.93 | -4.61 | -3.90 |
| A_84_P89629  | HB22     | AT4G24660 | 2.82  | 3.06  | 0.97  | 1.37  | 1.82  | 2.06  | 0.34  | 1.01  |
| A_84_P552504 | HEXO3    | AT1G65590 | 2.12  | 2.12  | 1.14  | 1.12  | 1.39  | 1.55  | 0.92  | 0.92  |
| A_84_P822127 | HEXO3    | AT1G65590 | 1.85  | 1.94  | 0.84  | 0.81  | 1.12  | 1.34  | 0.66  | 0.77  |
| A_84_P23171  | HSFA7A   | AT3G51910 | 1.42  | 1.28  | 0.27  | 0.11  | -0.76 | -0.48 | -0.41 | -0.37 |
| A_84_P16816  | IMS2     | AT5G23020 | -0.79 | -1.17 | -2.12 | -2.59 | -2.33 | -2.42 | -3.80 | -3.45 |
| A_84_P186864 | IQD12    | AT5G03960 | -1.49 | -1.47 | -3.52 | -3.63 | -3.89 | -3.61 | -4.36 | -4.98 |
| A_84_P581848 | JAG      | AT1G68480 | -1.80 | -1.11 | -3.55 | -2.88 | -3.02 | -2.62 | -4.50 | -4.56 |
| A_84_P14981  | KAT1     | AT5G46240 | 0.53  | 0.74  | -1.90 | -1.83 | -0.58 | -0.16 | -2.66 | -2.74 |
| A_84_P18075  | KNAT2    | AT1G70510 | -0.27 | 0.17  | -0.91 | -0.77 | -1.47 | -0.98 | -2.79 | -1.70 |
| A_84_P22432  | LAC8     | AT5G01040 | -0.94 | -0.59 | -2.34 | -1.49 | -3.29 | -2.75 | -3.66 | -2.17 |
| A_84_P277340 | LBD25    | AT3G27650 | -1.69 | -1.81 | -3.09 | -4.16 | -3.84 | -4.16 | -4.37 | -4.33 |
| A_84_P57010  | LBD39    | AT4G37540 | 5.05  | 5.04  | 3.38  | 3.77  | 4.09  | 4.04  | 2.98  | 3.23  |
| A_84_P592320 | LSH5     | AT5G58500 | -1.90 | -1.50 | -2.67 | -2.52 | -2.95 | -3.05 | -3.46 | -3.31 |
| A_84_P829388 | MAPKKK13 | AT1G07150 | 0.46  | 0.23  | -0.73 | -1.40 | -0.45 | -0.87 | -0.92 | -1.40 |
| A_84_P14478  | MES3     | AT2G23610 | 3.36  | 3.32  | 1.86  | 2.04  | 2.30  | 2.47  | 1.33  | 1.72  |
| A_84_P852772 | MES3     | AT2G23610 | 1.30  | 1.22  | -0.22 | 0.09  | 0.29  | 0.48  | -0.62 | -0.24 |
| A_84_P20466  | MIOX4    | AT4G26260 | -1.36 | -0.06 | -1.95 | -2.47 | -3.65 | -2.72 | -2.96 | -2.88 |
| A_84_P784727 | MLO10    | AT5G65970 | 1.44  | 1.42  | -0.95 | -1.35 | 0.48  | 0.32  | -1.20 | -1.46 |
| A_84_P17895  | MLO10    | AT5G65970 | 0.31  | 0.46  | -1.79 | -2.46 | -0.62 | -0.90 | -2.58 | -2.31 |
| A_84_P15083  | MSL9     | AT5G19520 | -1.57 | -0.53 | -2.34 | -1.29 | -2.55 | -1.84 | -2.21 | -1.99 |
| A_84_P11893  | MSRB6    | AT4G04840 | 2.71  | 2.58  | 1.04  | 0.87  | 1.07  | 1.51  | 0.70  | -0.10 |
| A_84_P15939  | MYB111   | AT5G49330 | 0.99  | 1.53  | -0.08 | 0.63  | -0.37 | 0.34  | -0.65 | -0.05 |
| A_84_P22464  | MYB92    | AT5G10280 | -2.03 | -1.59 | -3.13 | -3.15 | -2.96 | -2.68 | -4.74 | -4.02 |
| A_84_P21604  | NAC096   | AT5G46590 | -1.35 | -0.38 | -2.85 | -2.02 | -3.26 | -2.39 | -3.90 | -3.14 |
| A_84_P18118  | NAS4     | AT1G56430 | 2.57  | 3.18  | 1.82  | 2.22  | 1.36  | 1.55  | 0.89  | 1.36  |
| A_84_P15219  | NLA      | AT1G02860 | 2.44  | 2.46  | 0.57  | 0.59  | 1.77  | 1.63  | 0.64  | 0.66  |
| A_84_P839037 | NP041809 |           | 0.58  | 0.58  | -0.58 | -0.84 | -0.41 | -0.23 | -1.39 | -1.22 |
| A_84_P11556  | NP454661 |           | -1.03 | -1.39 | -1.75 | -2.38 | -1.74 | -2.24 | -2.80 | -3.06 |
| A_84_P12427  | NRT1:2   | AT1G69850 | 1.47  | 1.11  | -0.27 | -0.44 | 0.83  | 0.47  | -0.54 | -0.54 |

|              |              |           |       |       |       |       |       |       |       |       |
|--------------|--------------|-----------|-------|-------|-------|-------|-------|-------|-------|-------|
| A_84_P821543 | NRT1:2       | AT1G69850 | -0.87 | -1.51 | -2.67 | -2.78 | -1.59 | -1.97 | -2.57 | -2.92 |
| A_84_P20458  | NRT1.5       | AT1G32450 | 1.58  | 1.99  | 0.59  | 0.61  | -1.22 | -1.44 | -1.95 | -1.47 |
| A_84_P587896 | OFFP12       | AT1G05420 | 0.72  | 1.30  | -1.97 | -1.19 | -0.14 | 0.42  | -2.02 | -1.39 |
| A_84_P22129  | OLEO4        | AT3G27660 | -0.47 | -0.52 | -2.61 | -3.66 | -1.10 | -2.90 | -3.16 | -3.95 |
| A_84_P18581  | OPT6         | AT4G27730 | 3.53  | 3.61  | 1.10  | 1.50  | 1.80  | 2.21  | 1.11  | 1.53  |
| A_84_P11903  | ORA59        | AT1G06160 | 1.88  | 1.80  | -0.55 | -0.84 | 0.54  | -0.32 | -1.02 | -1.73 |
| A_84_P10370  | PAL3         | AT5G04230 | 1.25  | 1.15  | -1.97 | -2.06 | 0.03  | 0.32  | -2.45 | -1.97 |
| A_84_P143149 | PDLP3        | AT2G33330 | 4.60  | 4.76  | 3.58  | 3.79  | 3.61  | 3.97  | 2.74  | 2.93  |
| A_84_P18992  | PDR7         | AT1G15210 | 0.21  | 0.93  | -1.64 | -0.67 | -1.04 | -0.57 | -2.63 | -1.53 |
| A_84_P13563  | PK1B         | AT2G28930 | 3.99  | 4.08  | 2.43  | 2.71  | 3.09  | 3.44  | 2.26  | 2.52  |
| A_84_P789454 | PK1B         | AT2G28930 | 3.25  | 3.35  | 1.78  | 1.98  | 2.40  | 2.72  | 1.49  | 1.83  |
| A_84_P851110 | PK1B         | AT2G28930 | 2.90  | 3.01  | 1.44  | 1.69  | 2.06  | 2.32  | 1.02  | 1.44  |
| A_84_P827013 | PKS1         | AT2G02950 | 2.86  | 2.53  | 0.59  | 0.22  | 1.75  | 1.65  | -0.03 | -0.27 |
| A_84_P241573 | PKS1         | AT2G02950 | 1.94  | 1.62  | -0.30 | -0.57 | 0.81  | 0.78  | -1.19 | -1.22 |
| A_84_P20232  | PME3         | AT3G14310 | 8.16  | 8.16  | 6.53  | 7.05  | 6.66  | 7.12  | 6.08  | 6.46  |
| A_84_P838448 | PME3         | AT3G14310 | 4.17  | 4.18  | 2.68  | 3.07  | 2.78  | 3.04  | 2.04  | 2.37  |
| A_84_P763649 | PMEP CRA     | AT4G03926 | 3.85  | 3.56  | 2.23  | 1.95  | 3.07  | 2.96  | 1.86  | 1.69  |
| A_84_P750624 | PMEP CRA     | AT1G11580 | 3.67  | 3.42  | 1.91  | 1.79  | 2.89  | 2.73  | 1.67  | 1.42  |
| A_84_P846184 | PMEP CRA     | AT1G11580 | 1.16  | 0.87  | -0.45 | -0.58 | 0.36  | 0.32  | -0.72 | -1.03 |
| A_84_P287770 | PP2-A13      | AT3G61060 | 2.28  | 2.25  | 1.12  | 1.35  | 0.76  | 0.61  | 0.60  | 0.67  |
| A_84_P789365 | PP2-A13      | AT3G61060 | 1.67  | 1.66  | 0.37  | 0.73  | 0.11  | 0.04  | -0.05 | 0.12  |
| A_84_P11805  | PS3          | AT3G47420 | 2.31  | 2.09  | 1.60  | 1.22  | 1.40  | 0.96  | 1.30  | 1.31  |
| A_84_P142599 | PSY1         | AT5G58650 | 2.61  | 2.29  | 1.43  | 0.84  | 1.88  | 1.39  | 1.40  | 0.92  |
| A_84_P837948 | PUP2         | AT2G33750 | -0.75 | -0.60 | -2.79 | -2.30 | -1.41 | -1.22 | -2.63 | -2.62 |
| A_84_P550871 | PUP2         | AT2G33750 | -0.80 | -0.65 | -3.53 | -3.00 | -1.43 | -1.28 | -4.09 | -3.77 |
| A_84_P197484 | PYL4         | AT2G38310 | 4.80  | 4.71  | 1.83  | 2.27  | 2.93  | 2.54  | 1.01  | 1.59  |
| A_84_P146199 | PYL5         | AT5G05440 | 4.10  | 3.25  | 1.86  | 1.04  | 2.82  | 1.98  | 2.32  | 2.25  |
| A_84_P817892 | PYL5         | AT5G05440 | 2.56  | 1.81  | 0.30  | -0.47 | 1.31  | 0.58  | 0.84  | 0.88  |
| A_84_P852047 | PYL5         | AT5G05440 | 0.69  | -0.06 | -1.46 | -2.37 | -0.61 | -1.19 | -0.81 | -0.93 |
| A_84_P174151 | PYL6         | AT2G40330 | 3.38  | 3.16  | -1.17 | -1.37 | 1.62  | -0.41 | -2.00 | -2.54 |
| A_84_P120122 | PYR1         | AT4G17870 | 6.09  | 5.88  | 3.23  | 3.45  | 4.08  | 3.79  | 2.78  | 3.05  |
| A_84_P13235  | RAV1         | AT1G13260 | 2.74  | 2.62  | 1.66  | 1.18  | 1.79  | 1.89  | 1.74  | 1.98  |
| A_84_P94069  | RCAR3        | AT5G53160 | 3.42  | 3.33  | 1.93  | 1.86  | 2.82  | 2.64  | 1.41  | 1.51  |
| A_84_P757994 | RL4          | AT2G18328 | 0.81  | 0.87  | -2.47 | -2.77 | 0.14  | 0.08  | -2.75 | -3.22 |
| A_84_P262420 | RLP26        | AT2G33050 | 1.32  | 1.38  | -0.06 | 0.07  | 0.17  | 0.52  | -0.42 | -0.04 |
| A_84_P758675 | RLP26        | AT2G33051 | -3.28 | -2.88 | -3.87 | -3.34 | -3.88 | -3.50 | -3.39 | -3.95 |
| A_84_P22100  | RLP33        | AT3G05660 | -1.46 | -1.92 | -2.51 | -2.83 | -2.28 | -2.55 | -3.26 | -3.19 |
| A_84_P852482 | RLP33        | AT3G05660 | -2.06 | -2.51 | -3.40 | -3.30 | -2.93 | -3.12 | -2.72 | -3.41 |
| A_84_P21088  | RR16         | AT2G40670 | 2.92  | 2.99  | 2.17  | 1.51  | 1.88  | 2.40  | 1.33  | 1.55  |
| A_84_P223736 | SD1-13       | AT1G11350 | 2.47  | 2.37  | 0.95  | 0.77  | 1.84  | 1.78  | 0.80  | 0.66  |
| A_84_P868051 | SD1-13       | AT1G11350 | 2.15  | 2.08  | 0.68  | 0.51  | 1.50  | 1.33  | 0.45  | 0.41  |
| A_84_P22400  | SEN1         | AT4G35770 | 2.14  | 0.81  | 0.96  | -0.07 | 1.18  | -0.15 | 0.32  | 0.27  |
| A_84_P857167 | SEN1         | AT4G35770 | 0.46  | -0.58 | -0.60 | -1.43 | -0.29 | -1.61 | -1.24 | -1.29 |
| A_84_P18467  | SIP2         | AT3G57520 | 6.18  | 6.47  | 5.34  | 5.61  | 5.17  | 4.88  | 4.77  | 4.44  |
| A_84_P806643 | SIP2         | AT3G57520 | 4.90  | 5.17  | 4.20  | 4.46  | 3.94  | 3.65  | 3.58  | 3.30  |
| A_84_P597566 | SLAH3        | AT5G24030 | 2.14  | 1.88  | 1.03  | 0.41  | 1.48  | 0.77  | 0.56  | -0.31 |
| A_84_P576326 | SPCH         | AT5G53210 | 2.27  | 2.29  | -0.21 | 0.27  | 1.38  | 1.69  | -0.36 | 0.21  |
| A_84_P14671  | SRS6         | AT3G54430 | 1.46  | 1.63  | -0.22 | -0.28 | 0.46  | 0.84  | -1.03 | -0.64 |
| A_84_P811601 | TA29106_3702 |           | -0.37 | -0.45 | -1.46 | -1.64 | -3.12 | -2.92 | -2.85 | -2.66 |
| A_84_P103886 | TBL45        | AT2G30010 | 5.75  | 5.83  | 3.74  | 4.00  | 4.71  | 4.76  | 3.55  | 3.88  |
| A_84_P807831 | TBL45        | AT2G30010 | 4.96  | 5.04  | 3.05  | 3.30  | 3.91  | 3.99  | 2.84  | 3.19  |
| A_84_P850182 | TC384346     |           | 1.33  | 1.39  | -0.45 | -0.11 | -1.62 | -0.99 | -3.20 | -1.94 |
| A_84_P101906 | TIFY7        | AT1G70700 | 3.79  | 3.00  | 2.31  | 2.37  | 2.51  | 2.07  | 1.74  | 1.20  |
| A_84_P20456  | TLP1         | AT4G24180 | -1.35 | -1.01 | -1.93 | -1.77 | -2.06 | -1.50 | -2.40 | -2.02 |
| A_84_P838419 | TLP1         | AT4G24180 | -2.49 | -2.05 | -3.38 | -3.16 | -3.25 | -2.81 | -3.99 | -3.25 |
| A_84_P275730 | TMAC2        | AT3G02140 | 3.23  | 2.84  | 0.49  | 0.65  | 1.93  | 1.10  | -0.05 | 0.05  |
| A_84_P18147  | TPS1         | AT1G78580 | 3.37  | 3.53  | 2.61  | 2.85  | 2.49  | 2.58  | 1.81  | 1.92  |
| A_84_P850500 | TPS1         | AT1G78580 | -1.76 | -1.56 | -2.18 | -1.99 | -2.31 | -2.29 | -2.39 | -2.52 |
| A_84_P20176  | UCC2         | AT2G44790 | -1.14 | -0.22 | -1.94 | -1.35 | -2.35 | -2.23 | -2.44 | -2.23 |
| A_84_P19988  | UGE1         | AT1G12780 | 3.11  | 3.10  | 2.23  | 2.22  | 2.31  | 2.24  | 1.72  | 1.72  |
| A_84_P856422 | UGE1         | AT1G12780 | 1.16  | 1.14  | 0.36  | 0.26  | 0.33  | 0.41  | -0.13 | -0.10 |
| A_84_P812267 | UGE1         | AT1G12780 | 1.01  | 1.02  | 0.22  | 0.07  | 0.21  | 0.35  | -0.31 | -0.42 |
| A_84_P812266 | UGE1         | AT1G12780 | 0.93  | 0.89  | 0.18  | 0.11  | 0.17  | 0.21  | -0.34 | -0.34 |
| A_84_P15827  | UGT76C2      | AT5G05860 | 3.79  | 3.53  | 2.90  | 2.21  | 2.78  | 2.27  | 2.13  | 1.56  |
| A_84_P20025  | UGT85A2      | AT1G22360 | 4.13  | 4.03  | 2.40  | 2.92  | 2.62  | 2.72  | 1.58  | 2.11  |
| A_84_P860389 | UGT85A2      | AT1G22360 | -2.03 | -1.80 | -3.14 | -2.82 | -3.12 | -3.50 | -4.97 | -4.03 |
| A_84_P17955  | UGT85A3      | AT1G22380 | -1.03 | -0.44 | -1.74 | -1.17 | -1.69 | -1.38 | -2.33 | -2.02 |
| A_84_P13341  | UGT85A4      | AT1G78270 | 3.12  | 2.96  | 1.89  | 2.14  | 1.53  | 2.05  | 1.45  | 1.73  |
| A_84_P803356 | UGT85A4      | AT1G78270 | 2.74  | 2.53  | 1.46  | 1.74  | 1.06  | 1.63  | 1.02  | 1.30  |
| A_84_P753447 | UGT85A4      | AT1G78265 | -0.44 | -0.59 | -0.06 | -0.10 | -0.12 | -0.15 | 0.00  | 0.07  |
| A_84_P831400 | USPL1        | AT1G49320 | 3.30  | 3.51  | 1.48  | 1.19  | 2.32  | 2.74  | 0.55  | 1.25  |
| A_84_P147788 | USPL1        | AT1G49320 | -1.20 | -1.06 | -2.72 | -2.98 | -1.84 | -1.54 | -3.77 | -3.39 |
| A_84_P232439 | WRKY18       | AT4G31800 | 4.58  | 4.68  | 1.94  | 1.92  | 2.98  | 2.72  | 2.08  | 1.93  |
| A_84_P785249 | WRKY18       | AT4G31800 | 2.17  | 2.30  | -0.46 | -0.32 | 0.56  | 0.27  | -0.29 | -0.52 |

|              |        |           |       |       |       |       |       |       |       |       |
|--------------|--------|-----------|-------|-------|-------|-------|-------|-------|-------|-------|
| A_84_P23291  | WRKY29 | AT4G23550 | 1.98  | 1.95  | 0.73  | 1.02  | 1.08  | 1.20  | 0.28  | 0.81  |
| A_84_P10326  | XYL4   | AT5G64570 | 7.59  | 7.94  | 5.78  | 6.12  | 6.23  | 6.92  | 5.10  | 5.85  |
| A_84_P768803 | XYL4   | AT5G64572 | -1.46 | -1.48 | -2.41 | -1.89 | -1.77 | -1.96 | -2.20 | -2.13 |
| A_84_P235383 | YSL1   | AT4G24120 | 2.00  | 1.47  | -1.08 | -1.16 | 1.48  | 0.69  | -1.56 | -2.13 |
| A_84_P823427 | YSL1   | AT4G24120 | 1.67  | 1.14  | -1.19 | -1.54 | 1.08  | 0.44  | -1.66 | -2.33 |
| A_84_P16644  | YUC2   | AT4G13260 | 0.44  | 0.22  | -2.02 | -1.66 | -1.34 | -0.83 | -3.43 | -2.74 |

---
